# Supplementary material for: A forecast model for prevention of foodborne outbreaks of non-typhoidal salmonellosis
Source: PeerJ. 2020 Nov 10;8:e10009. doi: 10.7717/peerj.10009 (PMC7664469; doi:10.7717/peerj.10009)
Supplement: Supplemental Information 1 [file peerj-08-10009-s001.xlsx]

## Sheet: Hoja1
Week	Report/week	Mean Temperature (°C/week)	Mean Humidity(%/week)	Demand for pork meat (Gr/person*week)	Demand for poultry (Gr/person*week)	Demand for eggs (units/person*week)
1	22	25.3834	75.5503	584.82	411.714	2.26651
2	0	17.3226	62.8925	477.829	377.198	1.88678
3	19	23.8418	72.9877	587.514	425.242	2.18963
4	1	19.9348	66.6678	501.181	381.599	2.00003
5	4	21.15	66.8611	540.232	411.117	2.00583
6	36	25.5689	79.9243	593.903	449.763	2.6375
7	10	25.4379	69.4089	523.456	376.417	2.24422
8	1	18.8709	64.0365	515.304	401.525	2.04917
9	6	23.1217	69.7158	519.369	399.655	2.20767
10	9	21.8617	70.1011	595.511	444.668	2.3367
11	26	24.5947	71.3425	630.944	470.937	2.2354
12	0	18.8328	65.9983	496.505	391.941	2.17794
13	2	20.4139	68.6092	552.643	393.537	2.08115
14	18	25.1448	68.1683	609.764	428.908	2.06777
15	10	28.0906	63.9339	463.582	342.912	1.96064
16	38	25.3885	76.7877	631.267	489.168	2.40601
17	15	26.5177	70.4191	552.86	390.761	2.25341
18	11	23.6738	73.7529	549.194	418.376	2.23717
19	4	21.747	70.7738	512.701	383.5	2.21758
20	12	23.9561	70.6232	564.076	403.653	2.30702
21	1	18.9001	68.2758	574.436	424.163	2.18483
22	0	19.612	65.3424	437.922	312.808	2.04739
23	10	22.5279	72.4941	548.347	392.616	2.22315
24	35	26.0558	75.1404	607.342	459.819	2.45459
25	4	21.2854	69.9636	536.335	427.888	2.26216
26	0	17.0394	69.7475	574.686	447.91	2.13892
27	4	22.6613	69.0358	476.764	339.17	2.25517
28	0	18.1656	66.4198	500.241	398.042	2.16971
29	0	17.509	61.9993	476.754	361.761	1.92198
30	7	19.8965	74.2324	588.587	425.137	2.37544
31	5	23.056	63.7301	536.026	383.473	2.08185
32	0	16.9903	58.5508	456.041	329.535	1.79556
33	3	20.0112	72.2443	519.943	388.658	2.26365
34	6	20.6508	69.7814	606.262	484.282	2.30279
35	0	19.3388	61.4753	442.368	334.209	2.04918
36	1	18.6438	67.8649	573.593	408.341	2.26216
37	3	20.9358	66.8855	539.644	396.53	2.09575
38	0	18.4787	62.4808	510.414	389.14	2.06187
39	17	23.5413	75.0514	575.407	452.27	2.40165
40	13	24.263	69.7056	566.991	444.407	2.18411
41	16	22.2855	72.3241	659.731	505.222	2.16972
42	64	30.4956	74.7397	627.648	489.189	2.34184
43	19	24.565	71.9005	578.728	459.278	2.22892
44	6	24.1771	64.9995	540.664	417.122	1.97165
45	3	18.7899	68.7432	568.27	452.57	2.26852
46	1	18.6784	68.2899	543.275	422.776	2.20804
47	1	18.9811	66.2157	561.048	396.605	2.14098
48	0	17.9002	66.851	495.406	383.147	2.09466
49	0	17.8452	63.7847	492.8	352.204	2.04111
50	0	16.8693	65.1005	559.814	396.461	2.06151
51	0	18.8975	60.0769	461.388	326.432	1.90244
52	6	21.1384	67.8422	620.078	445.96	2.23879
53	3	21.089	66.0497	551.433	390.249	2.09157
54	0	17.6752	66.352	485.572	340.143	2.03479
55	18	24.1864	72.2967	591.898	430.133	2.2894
56	6	22.8539	67.2661	515.055	376.556	2.21978
57	4	20.8429	69.5426	534.11	419.223	2.08628
58	24	24.412	74.4088	615.517	477.272	2.38108
59	4	20.6495	67.2186	570.594	439.187	2.24062
60	8	22.2796	71.1175	579.51	440.486	2.37058
61	4	22.2028	68.4886	552.494	392.602	2.26012
62	20	25	72.1905	593.605	438.258	2.33416
63	0	15.5791	69.6787	540.663	386.682	2.11359
64	8	22.7975	69.5771	569.72	435.38	2.1337
65	4	22.0651	67.8148	565.624	438.867	2.21528
66	5	20.4369	69.8585	587.358	420.607	2.11904
67	8	23.6822	70.2758	581.237	424.942	2.15513
68	4	22.4743	65.9908	524.18	374.265	2.1117
69	25	26.1516	72.7733	542.254	413.035	2.28023
70	7	22.9907	68.3516	498.026	394.487	2.1189
71	1	19.1026	68.2411	541.363	398.389	2.16097
72	3	20.1845	66.588	575.155	421.071	2.15301
73	0	14.8297	68.4794	507.932	400.809	2.07721
74	2	20.9373	67.2594	510.055	377.39	2.0402
75	7	21.3994	69.0888	578.893	408.062	2.18781
76	0	18.9155	62.1898	466.473	350.974	2.05226
77	9	24.0002	70.3388	551.363	432.599	2.29773
78	1	20.135	66.9808	495.048	389.85	2.18804
79	5	23.2487	69.2955	505.517	394.506	2.28675
80	8	22.6471	69.4458	558.69	391.306	2.31486
81	4	22.6586	67.4735	543.315	421.015	2.0467
82	0	18.1481	64.426	498.883	357.101	2.12606
83	14	25.1669	70.203	557.348	405.137	2.19969
84	2	21.6132	68.9203	537.703	397.524	2.13653
85	1	20.5412	63.7897	503.889	370.308	1.97748
86	0	15.946	62.3272	485.266	349.149	1.86982
87	1	21.7896	67.1218	474.402	359.787	2.08078
88	15	22.6869	71.5603	610.421	477.105	2.28993
89	0	16.0946	64.4816	504.215	366.413	2.1064
90	6	20.6101	69.2932	544.687	408.406	2.17119
91	4	20.1316	70.5642	560.601	433.849	2.21101
92	7	22.4655	68.7712	605.789	442.104	2.06314
93	7	20.0236	70.2004	577.232	435.926	2.34001
94	7	23.7786	66.6563	515.357	370.233	2.133
95	0	18.8324	64.4382	505.446	396.775	1.99758
96	24	24.186	72.8097	612.956	471.915	2.2571
97	1	18.8472	70.1994	515.625	401.878	2.19958
98	29	24.6346	73.5754	643.59	496.787	2.23179
99	36	25.9125	74.0146	580.242	423.229	2.31912
100	1	21.4543	61.4108	513.79	376.763	2.02656
101	3	20.0925	69.9977	502.366	355.123	2.28659
102	9	22.6908	70.2948	556.737	411.763	2.13227
103	1	19.2545	66.6953	568.872	408.564	2.08979
104	0	16.0261	63.0368	452.469	318.04	1.93313
105	8	21.1816	69.7471	571.17	443.856	2.09241
106	14	22.5247	73.3479	623.864	487.113	2.37158
107	1	20.4446	64.9093	495.123	378.62	2.05546
108	8	23.408	70.7069	520.757	396.504	2.23905
109	33	24.4095	75.5902	621.966	437.304	2.2929
110	21	21.8027	74.7737	616.99	481.005	2.41768
111	12	23.0598	71.4203	597.835	463.083	2.26164
112	0	21.4248	62.8259	477.583	381.159	1.9476
113	2	21.8338	63.6919	518.852	415.082	2.03814
114	1	20.6751	63.2824	519.051	399.825	2.02504
115	1	19.4383	65.6963	574.24	403.978	2.01469
116	1	19.2865	64.0041	541.855	430.937	1.94146
117	11	23.6809	69.1833	553.876	420.336	2.25999
118	14	22.7988	71.4158	515.762	377.796	2.30911
119	1	17.0252	67.5762	570.291	442.774	2.04981
120	11	22.4995	74.2232	650.614	511.903	2.2267
121	12	22.7669	69.8092	583.696	453.941	2.28043
122	0	19.1263	65.5344	524.587	418.62	2.07526
123	2	19.2357	66.9362	521.758	392.101	2.18658
124	3	20.9775	67.236	528.499	395.952	2.15155
125	4	20.8119	67.3874	569.493	446.653	2.08901
126	7	22.3391	69.7561	573.121	418.035	2.30195
127	2	20.9186	67.7128	537.339	428.528	2.18938
128	0	17.963	65.3831	482.495	376.394	2.17944
129	1	18.0725	67.0645	568.729	423.248	2.10135
130	64	30.2026	76.2033	616.489	451.146	2.54011
131	4	21.3312	67.6029	552.645	439.629	2.25343
132	2	21.2331	67.2592	501.76	370.148	2.24197
133	6	20.3019	72.4115	600.855	428.169	2.19648
134	10	25.8758	65.9053	521.85	396.815	2.06503
135	0	18.5066	66.9189	536.935	414.191	2.20832
136	5	20.4655	68.7522	579.832	441.774	2.17715
137	5	22.0162	70.1662	550.75	390.317	2.24532
138	21	25.3823	72.0324	522.979	372.047	2.16097
139	8	21.7778	70.6193	559.659	428.643	2.25982
140	0	20.2965	58.8584	430.221	332.862	1.90309
141	10	22.5112	68.8814	579.297	461.757	2.0894
142	27	23.4192	76.082	635.414	448.793	2.43462
143	12	25.6852	68.5662	538.242	419.183	2.1027
144	7	23.6626	67.5833	528.999	387.809	2.16267
145	24	24.8961	73.1672	580.818	459.95	2.31696
146	1	19.7325	65.2351	490.16	388.402	2.10927
147	7	22.0862	67.7221	582.167	461.192	2.03166
148	20	23.2009	74.2626	586.013	452.753	2.3269
149	7	23.2152	67.611	541.881	433.126	2.18609
150	5	20.2784	71.5439	572.266	401.845	2.36095
151	1	20.4205	65.3013	516.45	409.028	1.98081
152	0	17.5643	62.1891	553.101	429.483	1.86567
153	2	19.7078	67.8122	531.082	404.844	2.03437
154	2	18.0727	69.174	546.781	389.418	2.28274
155	0	17.3957	64.0239	541.262	429.6	2.13413
156	0	17.913	60.5987	479.302	342.749	1.85836
