# Supplementary material for: A forecast model for prevention of foodborne outbreaks of non-typhoidal salmonellosis
Source: PeerJ. 2020 Nov 10;8:e10009. doi: 10.7717/peerj.10009 (PMC7664469; doi:10.7717/peerj.10009)
Supplement: Supplemental Information 2 [file peerj-08-10009-s002.xlsx]

## Sheet: Salmonella Public Dataset
Salmonella NNDSS notifications in Australia 2009-2016 *NNDSS data current as at 24/07/2017
Week Ending (Friday)	State	Age group	Sex	Serovar
2017-01-06	NSW	00-04	Female	S.VIRCHOW
2017-01-06	NSW	20-24	Female	S.TYPHIMURIUM
2017-01-06	NSW	25-29	Male	S.TYPHIMURIUM
2017-01-06	NSW	30-34	Female	S.BIRKENHEAD
2017-01-06	NSW	50-54	Female	S.TYPHIMURIUM
2017-01-06	NSW	60-64	Male	UNSPECIFIED
2017-01-06	NSW	75-79	Male	S.INFANTIS
2017-01-06	Qld	00-04	Male	S.TYPHIMURIUM
2017-01-06	Qld	05-09	Female	S.TYPHIMURIUM
2017-01-06	Qld	05-09	Male	S.BIRKENHEAD
2017-01-06	Qld	30-34	Male	UNSPECIFIED
2017-01-06	Qld	45-49	Male	S.SAINTPAUL
2017-01-06	Qld	65-69	Female	S.TYPHIMURIUM
2017-01-06	Qld	80-84	Male	UNSPECIFIED
2017-01-06	SA	00-04	Female	S.TYPHIMURIUM
2017-01-06	SA	55-59	Male	S.TYPHIMURIUM
2017-01-06	SA	60-64	Female	S.TYPHIMURIUM
2017-01-06	SA	65-69	Female	S.TYPHIMURIUM
2017-01-06	Tas	70-74	Female	S.MISSISSIPPI
2017-01-06	Vic	05-09	Female	S.TYPHIMURIUM
2017-01-06	Vic	20-24	Female	S.TYPHIMURIUM
2017-01-06	Vic	35-39	Male	UNSPECIFIED
2017-01-06	Vic	85+	Female	S.TYPHIMURIUM
2017-01-06	WA	00-04	Male	S.TYPHIMURIUM
2017-01-06	WA	30-34	Female	S.TYPHIMURIUM
2017-01-06	WA	35-39	Male	S.PARATYPHI B BV JAVA
2017-01-06	WA	70-74	Female	S.WELTEVREDEN
2017-01-06	WA	85+	Female	S.ABERDEEN
2017-01-06	NSW	00-04	Male	S.ADELAIDE
2017-01-06	NSW	00-04	Male	S.TYPHIMURIUM
2017-01-06	NSW	05-09	Female	S.ENTERITIDIS
2017-01-06	NSW	35-39	Female	S.TYPHIMURIUM
2017-01-06	NSW	40-44	Female	S.TYPHIMURIUM
2017-01-06	NSW	40-44	Male	S.ENTERITIDIS
2017-01-06	NSW	55-59	Male	S.SUBSP I SER 4,5,12:I:-
2017-01-06	NSW	75-79	Male	S.TYPHIMURIUM
2017-01-06	Qld	00-04	Female	S.BIRKENHEAD
2017-01-06	Qld	00-04	Male	S.AGONA
2017-01-06	Qld	00-04	Male	S.ENTERITIDIS
2017-01-06	Qld	00-04	Male	S.VIRCHOW
2017-01-06	Qld	05-09	Male	S.ENTERITIDIS
2017-01-06	Qld	05-09	Male	S.TYPHIMURIUM
2017-01-06	Qld	05-09	Male	S.TYPHIMURIUM
2017-01-06	Qld	05-09	Male	S.TYPHIMURIUM
2017-01-06	Qld	10-14	Female	UNSPECIFIED
2017-01-06	Qld	30-34	Female	S.VIRCHOW
2017-01-06	Qld	30-34	Male	S.ENTERITIDIS
2017-01-06	Qld	40-44	Male	S.TYPHIMURIUM
2017-01-06	Qld	45-49	Male	S.SAINTPAUL
2017-01-06	Qld	50-54	Male	S.SAINTPAUL
2017-01-06	Qld	65-69	Male	S.ENTERITIDIS
2017-01-06	Qld	65-69	Male	S.HVITTINGFOSS
2017-01-06	Qld	70-74	Male	S.HVITTINGFOSS
2017-01-06	Qld	75-79	Male	UNSPECIFIED
2017-01-06	SA	00-04	Female	S.TYPHIMURIUM
2017-01-06	SA	00-04	Male	S.CHESTER
2017-01-06	SA	00-04	Male	S.ZANZIBAR
2017-01-06	SA	25-29	Female	S.TYPHIMURIUM
2017-01-06	SA	30-34	Male	S.ANATUM
2017-01-06	SA	55-59	Female	S.ABERDEEN
2017-01-06	SA	60-64	Male	S.TYPHIMURIUM
2017-01-06	SA	75-79	Male	S.SUBSP I SER 4,5,12:I:-
2017-01-06	Tas	65-69	Female	S.PARATYPHI B BV JAVA
2017-01-06	Tas	80-84	Female	UNSPECIFIED
2017-01-06	Vic	00-04	Female	S.TYPHIMURIUM
2017-01-06	Vic	25-29	Female	UNSPECIFIED
2017-01-06	Vic	45-49	Female	S.TYPHIMURIUM
2017-01-06	Vic	70-74	Female	S.TYPHIMURIUM
2017-01-06	WA	00-04	Female	S.ANATUM
2017-01-06	WA	00-04	Male	S.TYPHIMURIUM
2017-01-06	WA	00-04	Male	UNSPECIFIED
2017-01-06	WA	15-19	Female	S.TYPHIMURIUM
2017-01-06	WA	15-19	Male	S.TYPHIMURIUM
2017-01-06	WA	45-49	Female	S.ENTERITIDIS
2017-01-06	WA	70-74	Female	S.SAINTPAUL
2016-12-30	NSW	00-04	Female	S.SUBSP I SER 4,5,12:I:-
2016-12-30	NSW	00-04	Female	S.TYPHIMURIUM
2016-12-30	NSW	05-09	Male	S.SAINTPAUL
2016-12-30	NSW	20-24	Male	S.KENTUCKY
2016-12-30	NSW	30-34	Female	S.NEWPORT
2016-12-30	NSW	30-34	Female	S.TYPHIMURIUM
2016-12-30	NSW	40-44	Female	S.JAVIANA
2016-12-30	NSW	45-49	Male	S.TYPHIMURIUM
2016-12-30	NSW	55-59	Female	S.TYPHIMURIUM
2016-12-30	NSW	55-59	Male	S.ENTERITIDIS
2016-12-30	NSW	55-59	Male	S.SINGAPORE
2016-12-30	NT	35-39	Female	S.SAINTPAUL
2016-12-30	Qld	00-04	Female	S.ABERDEEN
2016-12-30	Qld	00-04	Female	S.CHESTER
2016-12-30	Qld	00-04	Female	S.LONDON
2016-12-30	Qld	00-04	Female	S.MONTEVIDEO
2016-12-30	Qld	00-04	Female	S.TYPHIMURIUM
2016-12-30	Qld	00-04	Male	S.ABERDEEN
2016-12-30	Qld	00-04	Male	S.HVITTINGFOSS
2016-12-30	Qld	00-04	Male	S.MGULANI
2016-12-30	Qld	00-04	Male	S.MUENCHEN
2016-12-30	Qld	00-04	Male	S.VIRCHOW
2016-12-30	Qld	00-04	Male	UNSPECIFIED
2016-12-30	Qld	05-09	Male	UNSPECIFIED
2016-12-30	Qld	10-14	Male	UNSPECIFIED
2016-12-30	Qld	25-29	Female	S.ENTERITIDIS
2016-12-30	Qld	25-29	Female	S.VIRCHOW
2016-12-30	Qld	25-29	Male	S.WELTEVREDEN
2016-12-30	Qld	30-34	Female	S.SAINTPAUL
2016-12-30	Qld	70-74	Male	UNSPECIFIED
2016-12-30	Qld	75-79	Male	UNSPECIFIED
2016-12-30	Qld	80-84	Female	UNSPECIFIED
2016-12-30	SA	00-04	Male	S.BEAUDESERT
2016-12-30	SA	00-04	Male	S.TYPHIMURIUM
2016-12-30	SA	20-24	Male	S.TYPHIMURIUM
2016-12-30	SA	40-44	Female	S.TYPHIMURIUM
2016-12-30	SA	45-49	Male	S.TYPHIMURIUM
2016-12-30	SA	70-74	Female	S.SUBSP I SER 4,12:I:-
2016-12-30	Tas	55-59	Male	S.MISSISSIPPI
2016-12-30	Vic	00-04	Male	S.TYPHIMURIUM
2016-12-30	Vic	05-09	Female	S.TYPHIMURIUM
2016-12-30	Vic	05-09	Male	S.TYPHIMURIUM
2016-12-30	Vic	30-34	Female	S.TYPHIMURIUM
2016-12-30	Vic	70-74	Male	S.TYPHIMURIUM
2016-12-30	Vic	75-79	Female	S.TYPHIMURIUM
2016-12-30	Vic	80-84	Female	S.NEWPORT
2016-12-30	WA	05-09	Male	S.TYPHIMURIUM
2016-12-30	WA	05-09	Male	S.VIRCHOW
2016-12-30	WA	20-24	Male	S.TYPHIMURIUM
2016-12-30	WA	25-29	Female	S.TYPHIMURIUM
2016-12-30	WA	25-29	Male	S.CHESTER
2016-12-30	WA	45-49	Female	S.HVITTINGFOSS
2016-12-30	NSW	00-04	Male	S.LITCHFIELD
2016-12-30	NSW	00-04	Male	S.WELTEVREDEN
2016-12-30	NSW	05-09	Male	S.TYPHIMURIUM
2016-12-30	NSW	30-34	Female	S.KENTUCKY
2016-12-30	NSW	30-34	Female	S.MUENCHEN
2016-12-30	NSW	45-49	Female	S.ENTERITIDIS
2016-12-30	NSW	55-59	Female	UNSPECIFIED
2016-12-30	NSW	60-64	Female	UNSPECIFIED
2016-12-30	NSW	80-84	Female	S.ENTERITIDIS
2016-12-30	NT	00-04	Female	S.ADELAIDE
2016-12-30	NT	55-59	Female	S.ABERDEEN
2016-12-30	Qld	00-04	Female	S.WAYCROSS
2016-12-30	Qld	00-04	Male	S.ABERDEEN
2016-12-30	Qld	00-04	Male	S.HVITTINGFOSS
2016-12-30	Qld	00-04	Male	S.OSLO
2016-12-30	Qld	00-04	Male	S.WAYCROSS
2016-12-30	Qld	00-04	Male	UNSPECIFIED
2016-12-30	Qld	05-09	Male	S.SCHWARZENGRUND
2016-12-30	Qld	20-24	Female	S.MUENCHEN
2016-12-30	Qld	20-24	Female	UNSPECIFIED
2016-12-30	Qld	25-29	Female	S.SUBSP IIIB
2016-12-30	Qld	25-29	Male	S.INFANTIS
2016-12-30	Qld	30-34	Male	S.TYPHIMURIUM
2016-12-30	Qld	35-39	Female	S.TYPHIMURIUM
2016-12-30	Qld	35-39	Male	S.NEWPORT
2016-12-30	Qld	45-49	Male	UNSPECIFIED
2016-12-30	Qld	50-54	Female	S.ENTERITIDIS
2016-12-30	Qld	55-59	Female	S.TYPHIMURIUM
2016-12-30	Qld	55-59	Male	S.TYPHIMURIUM
2016-12-30	Qld	60-64	Female	S.SAINTPAUL
2016-12-30	Qld	65-69	Female	S.ENTERITIDIS
2016-12-30	Qld	70-74	Female	S.TYPHIMURIUM
2016-12-30	Qld	70-74	Female	UNSPECIFIED
2016-12-30	Qld	75-79	Male	S.CORVALLIS
2016-12-30	SA	25-29	Female	S.TYPHIMURIUM
2016-12-30	SA	30-34	Female	S.SUBSP I SER 4,12:I:-
2016-12-30	Vic	05-09	Male	S.TYPHIMURIUM
2016-12-30	Vic	10-14	Female	S.TYPHIMURIUM
2016-12-30	Vic	10-14	Male	S.TYPHIMURIUM
2016-12-30	Vic	20-24	Female	UNSPECIFIED
2016-12-30	Vic	25-29	Female	S.TYPHIMURIUM
2016-12-30	Vic	45-49	Female	S.SUBSP I SER 4,12:I:-
2016-12-30	Vic	50-54	Male	S.ENTERITIDIS
2016-12-30	Vic	80-84	Female	UNSPECIFIED
2016-12-30	Vic	85+	Female	S.TYPHIMURIUM
2016-12-30	WA	00-04	Male	S.TYPHIMURIUM
2016-12-30	WA	15-19	Male	S.TYPHIMURIUM
2016-12-30	WA	30-34	Female	S.GIVE VAR 15+
2016-12-30	WA	35-39	Male	UNSPECIFIED
2016-12-30	WA	60-64	Female	S.TYPHIMURIUM
2016-12-30	WA	60-64	Male	S.TYPHIMURIUM
2016-12-30	WA	65-69	Male	UNSPECIFIED
2016-12-30	NSW	00-04	Female	S.HEIDELBERG
2016-12-30	NSW	00-04	Female	S.TYPHIMURIUM
2016-12-30	NSW	00-04	Male	S.ABORTUSOVIS
2016-12-30	NSW	15-19	Female	S.ADELAIDE
2016-12-30	NSW	15-19	Male	S.ENTERITIDIS
2016-12-30	NSW	20-24	Male	S.NEWPORT
2016-12-30	NSW	25-29	Female	S.ABERDEEN
2016-12-30	NSW	25-29	Male	S.ENTERITIDIS
2016-12-30	NSW	35-39	Female	S.ENTERITIDIS
2016-12-30	NSW	45-49	Female	S.TYPHIMURIUM
2016-12-30	NSW	55-59	Male	S.TYPHIMURIUM
2016-12-30	NSW	75-79	Female	UNSPECIFIED
2016-12-30	Qld	00-04	Female	S.VIRCHOW
2016-12-30	Qld	00-04	Male	S.ABERDEEN
2016-12-30	Qld	00-04	Male	S.ENTERITIDIS
2016-12-30	Qld	20-24	Male	S.TYPHIMURIUM
2016-12-30	Qld	25-29	Female	S.STANLEY
2016-12-30	Qld	35-39	Male	UNSPECIFIED
2016-12-30	Qld	40-44	Female	S.TYPHIMURIUM
2016-12-30	Qld	60-64	Female	S.TYPHIMURIUM
2016-12-30	Qld	60-64	Male	S.OSLO
2016-12-30	Qld	65-69	Male	S.HAVANA
2016-12-30	Qld	85+	Male	S.TYPHIMURIUM
2016-12-30	SA	20-24	Female	S.TYPHIMURIUM
2016-12-30	SA	60-64	Male	S.TYPHIMURIUM
2016-12-30	SA	65-69	Female	S.TYPHIMURIUM
2016-12-30	Tas	05-09	Male	S.MISSISSIPPI
2016-12-30	Tas	35-39	Male	S.ADELAIDE
2016-12-30	Vic	00-04	Female	S.TYPHIMURIUM
2016-12-30	Vic	00-04	Male	S.MBANDAKA
2016-12-30	Vic	15-19	Male	S.ENTERITIDIS
2016-12-30	Vic	20-24	Female	S.TYPHIMURIUM
2016-12-30	Vic	30-34	Male	S.ENTERITIDIS
2016-12-30	Vic	40-44	Female	S.TYPHIMURIUM
2016-12-30	Vic	50-54	Male	S.OHIO
2016-12-30	Vic	55-59	Female	S.TYPHIMURIUM
2016-12-30	WA	00-04	Female	S.TYPHIMURIUM
2016-12-30	WA	00-04	Male	S.ENTERITIDIS
2016-12-30	WA	15-19	Female	S.TYPHIMURIUM
2016-12-30	WA	15-19	Male	S.TYPHIMURIUM
2016-12-30	WA	20-24	Female	S.TYPHIMURIUM
2016-12-30	WA	25-29	Male	UNSPECIFIED
2016-12-30	WA	45-49	Female	UNSPECIFIED
2016-12-30	WA	65-69	Female	S.TYPHIMURIUM
2016-12-30	WA	70-74	Female	S.ABERDEEN
2016-12-30	NSW	00-04	Female	UNSPECIFIED
2016-12-30	NSW	15-19	Female	S.WANGATA
2016-12-30	NSW	15-19	Male	S.WANGATA
2016-12-30	NSW	30-34	Female	S.TYPHIMURIUM
2016-12-30	NT	00-04	Female	S.SENFTENBERG
2016-12-30	NT	00-04	Male	S.KINONDONI
2016-12-30	NT	25-29	Male	S.SAINTPAUL
2016-12-30	NT	35-39	Male	S.SAINTPAUL
2016-12-30	NT	40-44	Male	S.VIRCHOW
2016-12-30	NT	45-49	Male	S.INFANTIS
2016-12-30	Qld	00-04	Female	S.BIRKENHEAD
2016-12-30	Qld	00-04	Female	S.HVITTINGFOSS
2016-12-30	Qld	00-04	Male	S.TYPHIMURIUM
2016-12-30	Qld	00-04	Male	S.TYPHIMURIUM
2016-12-30	Qld	10-14	Male	S.WANGATA
2016-12-30	Qld	20-24	Female	S.TYPHIMURIUM
2016-12-30	Qld	55-59	Male	S.TYPHIMURIUM
2016-12-30	Qld	75-79	Male	S.TYPHIMURIUM
2016-12-30	SA	00-04	Male	S.TYPHIMURIUM
2016-12-30	SA	15-19	Female	S.SUBSP I SER 4,5,12:I:-
2016-12-30	SA	35-39	Female	S.TYPHIMURIUM
2016-12-30	SA	75-79	Female	UNSPECIFIED
2016-12-30	Vic	15-19	Female	S.ABERDEEN
2016-12-30	Vic	20-24	Female	S.ABERDEEN
2016-12-30	Vic	25-29	Female	S.TYPHIMURIUM
2016-12-30	Vic	25-29	Female	S.TYPHIMURIUM
2016-12-30	Vic	30-34	Female	S.VIRCHOW
2016-12-30	Vic	80-84	Male	S.TYPHIMURIUM
2016-12-30	Vic	85+	Male	S.FREMANTLE
2016-12-30	WA	00-04	Male	S.TYPHIMURIUM
2016-12-30	WA	00-04	Male	S.VIRCHOW
2016-12-30	WA	15-19	Male	S.GIVE VAR 15+
2016-12-30	WA	35-39	Male	S.TYPHIMURIUM
2016-12-30	WA	75-79	Male	S.TYPHIMURIUM
2016-12-30	NSW	20-24	Male	S.BIRKENHEAD
2016-12-30	NSW	45-49	Female	S.SUBSP I SER 4,5,12:I:-
2016-12-30	NSW	75-79	Female	S.SAINTPAUL
2016-12-30	Qld	00-04	Female	S.TYPHIMURIUM
2016-12-30	Qld	00-04	Female	S.TYPHIMURIUM
2016-12-30	Qld	00-04	Male	UNSPECIFIED
2016-12-30	Qld	70-74	Female	UNSPECIFIED
2016-12-30	Qld	70-74	Male	UNSPECIFIED
2016-12-30	Qld	75-79	Female	UNSPECIFIED
2016-12-30	Qld	80-84	Male	S.ABERDEEN
2016-12-30	Qld	80-84	Male	S.OSLO
2016-12-30	Qld	85+	Male	UNSPECIFIED
2016-12-30	SA	00-04	Male	S.SAINTPAUL
2016-12-30	SA	20-24	Female	S.TYPHIMURIUM
2016-12-30	SA	20-24	Male	S.SUBSP I SER 4,5,12:I:-
2016-12-30	SA	35-39	Female	S.TYPHIMURIUM
2016-12-30	SA	60-64	Male	S.TYPHIMURIUM
2016-12-30	SA	85+	Female	S.INFANTIS
2016-12-30	Tas	60-64	Female	S.MISSISSIPPI
2016-12-30	Vic	30-34	Male	UNSPECIFIED
2016-12-30	Vic	60-64	Female	S.TYPHIMURIUM
2016-12-30	Vic	80-84	Female	S.TYPHIMURIUM
2016-12-30	Vic	80-84	Female	UNSPECIFIED
2016-12-30	WA	05-09	Female	S.TYPHIMURIUM
2016-12-30	WA	10-14	Male	S.PANAMA
2016-12-30	WA	25-29	Female	S.TYPHIMURIUM
2016-12-30	WA	40-44	Male	S.TYPHIMURIUM
2016-12-30	NSW	00-04	Female	S.SAINTPAUL
2016-12-30	NSW	60-64	Female	S.ADELAIDE
2016-12-30	NSW	60-64	Female	S.TYPHIMURIUM
2016-12-30	NSW	65-69	Male	S.TYPHIMURIUM
2016-12-30	NSW	65-69	Male	S.WANGATA
2016-12-30	NT	00-04	Male	S.BALL
2016-12-30	Qld	00-04	Female	S.TYPHIMURIUM
2016-12-30	Qld	05-09	Male	S.READING
2016-12-30	Qld	10-14	Female	S.WANGATA
2016-12-30	Qld	15-19	Female	S.TYPHIMURIUM
2016-12-30	Qld	50-54	Male	UNSPECIFIED
2016-12-30	Qld	55-59	Female	S.WELTEVREDEN
2016-12-30	Qld	60-64	Male	S.SINGAPORE
2016-12-30	Qld	85+	Female	UNSPECIFIED
2016-12-30	SA	50-54	Male	S.TYPHIMURIUM
2016-12-30	SA	50-54	Male	S.TYPHIMURIUM
2016-12-30	SA	60-64	Female	S.ONDERSTEPOORT
2016-12-30	Vic	00-04	Female	S.TYPHIMURIUM
2016-12-30	Vic	10-14	Male	S.TYPHIMURIUM
2016-12-30	Vic	15-19	Female	S.KIAMBU
2016-12-30	Vic	25-29	Male	S.TYPHIMURIUM
2016-12-30	Vic	65-69	Female	S.LITCHFIELD
2016-12-30	Vic	85+	Male	S.TYPHIMURIUM
2016-12-30	WA	15-19	Female	S.TYPHIMURIUM
2016-12-30	WA	15-19	Male	S.TYPHIMURIUM
2016-12-30	WA	20-24	Female	S.TYPHIMURIUM
2016-12-30	WA	35-39	Male	S.TYPHIMURIUM
2016-12-30	WA	50-54	Female	S.TYPHIMURIUM
2016-12-30	NSW	00-04	Female	S.TYPHIMURIUM
2016-12-30	NSW	00-04	Female	S.TYPHIMURIUM
2016-12-30	NSW	00-04	Male	S.TYPHIMURIUM
2016-12-30	NSW	00-04	Male	S.TYPHIMURIUM
2016-12-30	NSW	00-04	Male	S.WANGATA
2016-12-30	NSW	10-14	Female	S.TYPHIMURIUM
2016-12-30	NSW	15-19	Male	S.TYPHIMURIUM
2016-12-30	NSW	35-39	Female	S.WANDSWORTH
2016-12-30	NSW	70-74	Female	S.ABERDEEN
2016-12-30	Qld	05-09	Female	S.TYPHIMURIUM
2016-12-30	Qld	05-09	Female	S.VIRCHOW
2016-12-30	Qld	05-09	Male	S.POTSDAM
2016-12-30	Qld	40-44	Female	S.TYPHIMURIUM
2016-12-30	Qld	50-54	Male	S.WELTEVREDEN
2016-12-30	Qld	70-74	Male	S.BOVISMORBIFICANS
2016-12-30	Qld	75-79	Female	S.WAYCROSS
2016-12-30	SA	15-19	Female	S.TYPHIMURIUM
2016-12-30	SA	20-24	Female	S.SUBSP I SER 4,5,12:I:-
2016-12-30	SA	30-34	Female	S.SUBSP I SER 4,12:I:-
2016-12-30	SA	45-49	Male	S.TYPHIMURIUM
2016-12-30	SA	50-54	Female	S.TYPHIMURIUM
2016-12-30	SA	55-59	Female	S.TYPHIMURIUM
2016-12-30	SA	55-59	Female	UNSPECIFIED
2016-12-30	SA	60-64	Female	S.TYPHIMURIUM
2016-12-30	SA	65-69	Female	UNSPECIFIED
2016-12-30	Vic	00-04	Female	S.TYPHIMURIUM
2016-12-30	Vic	05-09	Female	S.TYPHIMURIUM
2016-12-30	Vic	10-14	Male	S.TYPHIMURIUM
2016-12-30	Vic	15-19	Male	UNSPECIFIED
2016-12-30	Vic	20-24	Male	S.TYPHIMURIUM
2016-12-30	Vic	20-24	Male	S.TYPHIMURIUM
2016-12-30	Vic	25-29	Male	S.TYPHIMURIUM
2016-12-30	Vic	55-59	Female	S.TYPHIMURIUM
2016-12-30	Vic	55-59	Male	S.WELIKADE
2016-12-30	Vic	60-64	Female	S.ENTERITIDIS
2016-12-30	Vic	80-84	Female	S.TYPHIMURIUM
2016-12-30	Vic	85+	Male	S.OHIO
2016-12-30	Vic	85+	Male	S.TYPHIMURIUM
2016-12-30	WA	00-04	Male	S.TYPHIMURIUM
2016-12-30	WA	00-04	Male	S.TYPHIMURIUM
2016-12-30	WA	05-09	Female	S.TYPHIMURIUM
2016-12-30	WA	20-24	Female	S.TYPHIMURIUM
2016-12-30	WA	40-44	Female	S.TYPHIMURIUM
2016-12-30	WA	40-44	Male	S.TYPHIMURIUM
2016-12-30	WA	45-49	Male	S.TYPHIMURIUM
2016-12-30	WA	65-69	Female	S.TYPHIMURIUM
2016-12-23	NSW	00-04	Female	S.BAREILLY
2016-12-23	NSW	00-04	Female	S.TYPHIMURIUM
2016-12-23	NSW	00-04	Female	S.TYPHIMURIUM
2016-12-23	NSW	00-04	Male	S.INFANTIS
2016-12-23	NSW	00-04	Male	S.JAVIANA
2016-12-23	NSW	00-04	Male	S.TYPHIMURIUM
2016-12-23	NSW	05-09	Female	UNSPECIFIED
2016-12-23	NSW	10-14	Female	S.TYPHIMURIUM
2016-12-23	NSW	40-44	Female	S.WANGATA
2016-12-23	NSW	55-59	Male	UNSPECIFIED
2016-12-23	NSW	60-64	Female	S.TYPHIMURIUM
2016-12-23	NSW	65-69	Female	S.TYPHIMURIUM
2016-12-23	NSW	65-69	Female	S.WANGATA
2016-12-23	NSW	80-84	Female	S.TYPHIMURIUM
2016-12-23	NT	00-04	Female	UNSPECIFIED
2016-12-23	Qld	00-04	Female	S.ABERDEEN
2016-12-23	Qld	00-04	Female	S.ABERDEEN
2016-12-23	Qld	00-04	Female	S.AGONA
2016-12-23	Qld	00-04	Female	S.TYPHIMURIUM
2016-12-23	Qld	00-04	Female	UNSPECIFIED
2016-12-23	Qld	00-04	Female	UNSPECIFIED
2016-12-23	Qld	05-09	Female	UNSPECIFIED
2016-12-23	Qld	10-14	Male	S.TYPHIMURIUM
2016-12-23	Qld	20-24	Female	S.TYPHIMURIUM
2016-12-23	Qld	25-29	Female	S.MBANDAKA
2016-12-23	Qld	30-34	Female	S.CHESTER
2016-12-23	Qld	30-34	Male	S.ABERDEEN
2016-12-23	Qld	35-39	Female	UNSPECIFIED
2016-12-23	Qld	40-44	Male	S.ABERDEEN
2016-12-23	Qld	50-54	Female	S.SUBSP IIIB
2016-12-23	Qld	50-54	Male	S.TYPHIMURIUM
2016-12-23	Qld	60-64	Female	UNSPECIFIED
2016-12-23	Qld	65-69	Female	S.AGONA
2016-12-23	Qld	65-69	Male	S.SAINTPAUL
2016-12-23	Qld	65-69	Male	UNSPECIFIED
2016-12-23	Qld	80-84	Male	UNSPECIFIED
2016-12-23	SA	05-09	Male	S.ADELAIDE
2016-12-23	SA	20-24	Female	S.TYPHIMURIUM
2016-12-23	SA	20-24	Female	S.TYPHIMURIUM
2016-12-23	SA	30-34	Female	S.TYPHIMURIUM
2016-12-23	SA	60-64	Male	S.TYPHIMURIUM
2016-12-23	SA	85+	Female	S.TYPHIMURIUM
2016-12-23	Tas	00-04	Male	S.MISSISSIPPI
2016-12-23	Vic	00-04	Male	S.TYPHIMURIUM
2016-12-23	Vic	10-14	Female	S.BALL
2016-12-23	Vic	15-19	Female	S.STANLEY
2016-12-23	Vic	20-24	Male	S.TYPHIMURIUM
2016-12-23	Vic	20-24	Male	S.TYPHIMURIUM
2016-12-23	Vic	25-29	Female	S.AGONA
2016-12-23	Vic	25-29	Female	S.TYPHIMURIUM
2016-12-23	Vic	30-34	Male	S.TYPHIMURIUM
2016-12-23	Vic	40-44	Male	S.BRAENDERUP
2016-12-23	Vic	80-84	Female	S.TYPHIMURIUM
2016-12-23	WA	15-19	Male	S.TYPHIMURIUM
2016-12-23	WA	25-29	Male	S.ENTERITIDIS
2016-12-23	WA	40-44	Female	S.TYPHIMURIUM
2016-12-23	NSW	00-04	Female	S.PARATYPHI B BV JAVA
2016-12-23	NSW	00-04	Female	S.SENFTENBERG
2016-12-23	NSW	00-04	Male	S.TYPHIMURIUM
2016-12-23	NSW	10-14	Male	S.TYPHIMURIUM
2016-12-23	NSW	10-14	Male	S.TYPHIMURIUM
2016-12-23	NSW	15-19	Male	S.STANLEY
2016-12-23	NSW	20-24	Female	UNSPECIFIED
2016-12-23	NSW	40-44	Female	S.TYPHIMURIUM
2016-12-23	NSW	50-54	Female	S.ENTERITIDIS
2016-12-23	NSW	50-54	Male	S.MISSISSIPPI
2016-12-23	NSW	65-69	Male	UNSPECIFIED
2016-12-23	Qld	00-04	Female	S.SUBSP IIIB
2016-12-23	Qld	00-04	Female	S.VIRCHOW
2016-12-23	Qld	00-04	Male	S.TYPHIMURIUM
2016-12-23	Qld	10-14	Male	S.SUBSP IIIB
2016-12-23	Qld	40-44	Female	S.SINGAPORE
2016-12-23	Qld	40-44	Female	S.VIRCHOW
2016-12-23	Qld	45-49	Female	S.ENTERITIDIS
2016-12-23	Qld	45-49	Male	S.THOMPSON
2016-12-23	Qld	45-49	Male	UNSPECIFIED
2016-12-23	Qld	55-59	Male	UNSPECIFIED
2016-12-23	Qld	60-64	Male	UNSPECIFIED
2016-12-23	Qld	70-74	Female	UNSPECIFIED
2016-12-23	Qld	70-74	Female	UNSPECIFIED
2016-12-23	Qld	75-79	Male	UNSPECIFIED
2016-12-23	SA	00-04	Female	S.SUBSP I SER 4,12:I:-
2016-12-23	SA	00-04	Male	S.TYPHIMURIUM
2016-12-23	SA	00-04	Male	UNSPECIFIED
2016-12-23	SA	20-24	Male	S.TYPHIMURIUM
2016-12-23	SA	55-59	Male	S.TYPHIMURIUM
2016-12-23	Tas	25-29	Male	S.TYPHIMURIUM
2016-12-23	Tas	60-64	Female	S.MISSISSIPPI
2016-12-23	Vic	15-19	Female	S.CHESTER
2016-12-23	Vic	35-39	Male	S.SUBSP I SER 4,12:I:-
2016-12-23	Vic	35-39	Male	S.TYPHIMURIUM
2016-12-23	Vic	45-49	Male	S.TYPHIMURIUM
2016-12-23	Vic	45-49	Male	S.TYPHIMURIUM
2016-12-23	Vic	65-69	Female	S.TYPHIMURIUM
2016-12-23	WA	00-04	Female	S.ABERDEEN
2016-12-23	WA	00-04	Female	S.TYPHIMURIUM
2016-12-23	WA	00-04	Male	S.SINGAPORE
2016-12-23	WA	10-14	Male	S.PARATYPHI B BV JAVA
2016-12-23	WA	75-79	Female	S.TYPHIMURIUM
2016-12-23	WA	75-79	Female	UNSPECIFIED
2016-12-23	NSW	00-04	Female	S.TYPHIMURIUM
2016-12-23	NSW	00-04	Female	S.TYPHIMURIUM
2016-12-23	NSW	00-04	Male	S.ENTERITIDIS
2016-12-23	NSW	00-04	Male	S.SUBSP I SER 4,5,12:I:-
2016-12-23	NSW	00-04	Male	S.TYPHIMURIUM
2016-12-23	NSW	00-04	Male	S.TYPHIMURIUM
2016-12-23	NSW	10-14	Male	UNSPECIFIED
2016-12-23	NSW	15-19	Male	UNSPECIFIED
2016-12-23	NSW	25-29	Male	S.INFANTIS
2016-12-23	NSW	30-34	Female	S.TYPHIMURIUM
2016-12-23	NSW	40-44	Male	S.TYPHIMURIUM
2016-12-23	NSW	50-54	Female	UNSPECIFIED
2016-12-23	NSW	60-64	Male	S.BOVISMORBIFICANS
2016-12-23	NSW	60-64	Male	S.SAINTPAUL
2016-12-23	NSW	65-69	Female	S.TYPHIMURIUM
2016-12-23	NSW	70-74	Male	S.POTSDAM
2016-12-23	NSW	85+	Female	S.SUBSP I SER 4,5,12:I:-
2016-12-23	NSW	85+	Female	S.SUBSP I SER 4,5,12:I:-
2016-12-23	NT	00-04	Female	S.TYPHIMURIUM
2016-12-23	Qld	00-04	Female	S.TYPHIMURIUM
2016-12-23	Qld	00-04	Female	UNSPECIFIED
2016-12-23	Qld	00-04	Male	S.MISSISSIPPI
2016-12-23	Qld	00-04	Male	S.TYPHIMURIUM
2016-12-23	Qld	05-09	Male	S.BIRKENHEAD
2016-12-23	Qld	05-09	Male	S.VIRCHOW
2016-12-23	Qld	10-14	Female	S.BIRKENHEAD
2016-12-23	Qld	15-19	Female	S.HVITTINGFOSS
2016-12-23	Qld	15-19	Female	S.READING
2016-12-23	Qld	15-19	Female	S.TYPHIMURIUM
2016-12-23	Qld	25-29	Female	S.TYPHIMURIUM
2016-12-23	Qld	45-49	Female	S.SAINTPAUL
2016-12-23	Qld	50-54	Female	UNSPECIFIED
2016-12-23	Qld	50-54	Male	S.HVITTINGFOSS
2016-12-23	Qld	55-59	Female	UNSPECIFIED
2016-12-23	Qld	55-59	Male	S.TYPHIMURIUM
2016-12-23	Qld	70-74	Male	UNSPECIFIED
2016-12-23	Qld	85+	Male	S.BIRKENHEAD
2016-12-23	SA	05-09	Female	S.TYPHIMURIUM
2016-12-23	SA	20-24	Female	S.PARATYPHI B BV JAVA
2016-12-23	Tas	35-39	Male	S.SAINTPAUL
2016-12-23	Vic	00-04	Male	S.TYPHIMURIUM
2016-12-23	Vic	05-09	Female	S.ENTERITIDIS
2016-12-23	Vic	05-09	Male	S.TYPHIMURIUM
2016-12-23	Vic	20-24	Female	S.TYPHIMURIUM
2016-12-23	Vic	20-24	Male	S.ENTERITIDIS
2016-12-23	Vic	40-44	Female	S.TYPHIMURIUM
2016-12-23	Vic	40-44	Female	S.TYPHIMURIUM
2016-12-23	Vic	40-44	Male	S.KENTUCKY
2016-12-23	Vic	50-54	Female	S.OHIO
2016-12-23	Vic	60-64	Female	S.BOVISMORBIFICANS
2016-12-23	Vic	60-64	Female	S.PARATYPHI B BV JAVA
2016-12-23	Vic	70-74	Female	S.PARATYPHI B BV JAVA
2016-12-23	Vic	85+	Male	S.TYPHIMURIUM
2016-12-23	WA	00-04	Female	S.SINGAPORE
2016-12-23	WA	00-04	Female	S.TYPHIMURIUM
2016-12-23	WA	15-19	Female	S.ENTERITIDIS
2016-12-23	WA	30-34	Female	S.TYPHIMURIUM
2016-12-23	WA	30-34	Male	S.INFANTIS
2016-12-23	WA	30-34	Male	S.TYPHIMURIUM
2016-12-23	WA	45-49	Female	S.INFANTIS
2016-12-23	WA	55-59	Female	S.HVITTINGFOSS
2016-12-23	NSW	00-04	Male	UNSPECIFIED
2016-12-23	NSW	05-09	Female	S.TYPHIMURIUM
2016-12-23	NSW	05-09	Female	UNSPECIFIED
2016-12-23	NSW	10-14	Male	S.TYPHIMURIUM
2016-12-23	NSW	15-19	Female	S.AGONA
2016-12-23	NSW	15-19	Male	S.TYPHIMURIUM
2016-12-23	NSW	20-24	Female	UNSPECIFIED
2016-12-23	NSW	25-29	Female	S.TYPHIMURIUM
2016-12-23	NSW	25-29	Male	S.VICTORIA
2016-12-23	NSW	45-49	Male	S.TYPHIMURIUM
2016-12-23	NSW	60-64	Male	S.ENTERITIDIS
2016-12-23	NT	60-64	Female	S.SAINTPAUL
2016-12-23	Qld	00-04	Female	S.TYPHIMURIUM
2016-12-23	Qld	00-04	Male	S.ABERDEEN
2016-12-23	Qld	00-04	Male	S.ADELAIDE
2016-12-23	Qld	00-04	Male	S.LITCHFIELD
2016-12-23	Qld	05-09	Male	S.BIRKENHEAD
2016-12-23	Qld	10-14	Male	S.LITCHFIELD
2016-12-23	Qld	20-24	Female	S.NEWPORT
2016-12-23	Qld	30-34	Female	UNSPECIFIED
2016-12-23	Qld	40-44	Male	UNSPECIFIED
2016-12-23	Qld	45-49	Female	S.VIRCHOW
2016-12-23	Qld	55-59	Female	S.VIRCHOW
2016-12-23	Qld	55-59	Female	S.WANGATA
2016-12-23	Qld	60-64	Female	S.ENTERITIDIS
2016-12-23	Qld	60-64	Male	UNSPECIFIED
2016-12-23	Qld	65-69	Female	S.TYPHIMURIUM
2016-12-23	Qld	65-69	Female	S.TYPHIMURIUM
2016-12-23	Qld	70-74	Female	S.WAYCROSS
2016-12-23	Qld	70-74	Male	S.WELTEVREDEN
2016-12-23	Qld	80-84	Female	S.VIRCHOW
2016-12-23	Qld	85+	Female	S.VIRCHOW
2016-12-23	SA	00-04	Male	S.TYPHIMURIUM
2016-12-23	SA	50-54	Male	S.ENTERITIDIS
2016-12-23	Vic	00-04	Female	S.VIRCHOW
2016-12-23	Vic	10-14	Male	S.TYPHIMURIUM
2016-12-23	Vic	20-24	Male	S.TYPHIMURIUM
2016-12-23	Vic	25-29	Male	S.TYPHIMURIUM
2016-12-23	Vic	40-44	Female	S.TYPHIMURIUM
2016-12-23	Vic	55-59	Female	S.TYPHIMURIUM
2016-12-23	Vic	75-79	Male	S.HAVANA
2016-12-23	Vic	85+	Female	S.TYPHIMURIUM
2016-12-23	WA	00-04	Female	UNSPECIFIED
2016-12-23	WA	10-14	Male	S.TYPHIMURIUM
2016-12-23	WA	10-14	Male	S.TYPHIMURIUM
2016-12-23	WA	20-24	Female	S.SINGAPORE
2016-12-23	WA	20-24	Male	S.WELTEVREDEN
2016-12-23	WA	25-29	Female	S.TYPHIMURIUM
2016-12-23	WA	35-39	Male	S.ORION
2016-12-23	WA	65-69	Female	S.TYPHIMURIUM
2016-12-23	WA	80-84	Male	S.TYPHIMURIUM
2016-12-23	NSW	35-39	Male	UNSPECIFIED
2016-12-23	NSW	55-59	Female	S.ENTERITIDIS
2016-12-23	NT	00-04	Female	S.ANATUM
2016-12-23	NT	00-04	Female	S.VIRCHOW
2016-12-23	Qld	00-04	Female	S.SAINTPAUL
2016-12-23	Qld	00-04	Female	S.WANGATA
2016-12-23	Qld	65-69	Female	S.ABERDEEN
2016-12-23	Qld	80-84	Female	UNSPECIFIED
2016-12-23	SA	00-04	Male	S.AGONA
2016-12-23	SA	00-04	Male	S.TYPHIMURIUM
2016-12-23	SA	10-14	Male	S.TYPHIMURIUM
2016-12-23	SA	60-64	Male	S.TYPHIMURIUM
2016-12-23	Tas	60-64	Female	S.TYPHIMURIUM
2016-12-23	Vic	00-04	Male	S.ENTERITIDIS
2016-12-23	Vic	05-09	Female	S.TYPHIMURIUM
2016-12-23	Vic	20-24	Female	S.STANLEY
2016-12-23	Vic	30-34	Female	S.TYPHIMURIUM
2016-12-23	Vic	30-34	Female	S.TYPHIMURIUM
2016-12-23	Vic	35-39	Male	S.TYPHIMURIUM
2016-12-23	Vic	40-44	Female	S.ENTERITIDIS
2016-12-23	Vic	40-44	Female	S.TYPHIMURIUM
2016-12-23	Vic	40-44	Female	S.TYPHIMURIUM
2016-12-23	Vic	45-49	Female	S.TYPHIMURIUM
2016-12-23	Vic	85+	Female	S.TYPHIMURIUM
2016-12-23	WA	15-19	Female	S.STANLEY
2016-12-23	WA	15-19	Male	S.TYPHIMURIUM
2016-12-23	NSW	00-04	Female	S.STANLEY
2016-12-23	NSW	00-04	Male	S.SAINTPAUL
2016-12-23	NSW	00-04	Male	S.STANLEY
2016-12-23	NSW	00-04	Male	S.TYPHIMURIUM
2016-12-23	NSW	05-09	Female	S.WANGATA
2016-12-23	NSW	10-14	Female	S.TYPHIMURIUM
2016-12-23	NSW	20-24	Male	S.TYPHIMURIUM
2016-12-23	NSW	25-29	Male	S.TYPHIMURIUM
2016-12-23	NSW	30-34	Female	S.TYPHIMURIUM
2016-12-23	NSW	40-44	Female	UNSPECIFIED
2016-12-23	NSW	40-44	Male	S.AGONA
2016-12-23	NSW	50-54	Male	UNSPECIFIED
2016-12-23	NSW	55-59	Female	S.TYPHIMURIUM
2016-12-23	NSW	55-59	Female	S.TYPHIMURIUM
2016-12-23	NT	05-09	Male	S.VIRCHOW
2016-12-23	Qld	00-04	Male	S.ABERDEEN
2016-12-23	Qld	00-04	Male	S.HVITTINGFOSS
2016-12-23	Qld	00-04	Male	S.KIAMBU
2016-12-23	Qld	00-04	Male	S.VIRCHOW
2016-12-23	Qld	35-39	Male	UNSPECIFIED
2016-12-23	SA	25-29	Male	UNSPECIFIED
2016-12-23	SA	60-64	Female	S.TYPHIMURIUM
2016-12-23	SA	60-64	Male	S.CHESTER
2016-12-23	Vic	00-04	Male	S.TYPHIMURIUM
2016-12-23	Vic	05-09	Female	S.TYPHIMURIUM
2016-12-23	Vic	05-09	Male	S.TYPHIMURIUM
2016-12-23	Vic	10-14	Female	S.TYPHIMURIUM
2016-12-23	Vic	15-19	Female	S.POONA
2016-12-23	Vic	15-19	Female	S.TYPHIMURIUM
2016-12-23	Vic	20-24	Female	S.TYPHIMURIUM
2016-12-23	Vic	25-29	Female	S.TYPHIMURIUM
2016-12-23	Vic	25-29	Male	S.TYPHIMURIUM
2016-12-23	Vic	45-49	Male	S.TYPHIMURIUM
2016-12-23	Vic	50-54	Male	S.TYPHIMURIUM
2016-12-23	Vic	50-54	Male	S.TYPHIMURIUM
2016-12-23	Vic	55-59	Female	S.TYPHIMURIUM
2016-12-23	Vic	60-64	Male	S.TYPHIMURIUM
2016-12-23	Vic	60-64	Male	S.TYPHIMURIUM
2016-12-23	Vic	70-74	Male	S.ENTERITIDIS
2016-12-23	Vic	70-74	Male	S.TYPHIMURIUM
2016-12-23	Vic	80-84	Male	S.TYPHIMURIUM
2016-12-23	Vic	85+	Female	S.TYPHIMURIUM
2016-12-23	WA	20-24	Female	S.PANAMA
2016-12-23	WA	25-29	Female	S.PARATYPHI B BV JAVA
2016-12-23	WA	25-29	Female	S.TYPHIMURIUM
2016-12-23	WA	30-34	Female	S.TYPHIMURIUM
2016-12-23	WA	45-49	Male	S.TYPHIMURIUM
2016-12-23	WA	50-54	Female	S.KIAMBU
2016-12-23	NSW	00-04	Female	S.INFANTIS
2016-12-23	NSW	00-04	Female	S.MONTEVIDEO
2016-12-23	NSW	05-09	Female	S.TYPHIMURIUM
2016-12-23	NSW	05-09	Male	UNSPECIFIED
2016-12-23	NSW	10-14	Male	UNSPECIFIED
2016-12-23	NSW	30-34	Male	S.TYPHIMURIUM
2016-12-23	NSW	45-49	Female	S.ENTERITIDIS
2016-12-23	NSW	45-49	Female	S.TYPHIMURIUM
2016-12-23	NSW	50-54	Male	S.TYPHIMURIUM
2016-12-23	NSW	60-64	Female	S.TYPHIMURIUM
2016-12-23	NSW	60-64	Female	S.WAYCROSS
2016-12-23	NSW	60-64	Male	S.TYPHIMURIUM
2016-12-23	NSW	60-64	Male	S.TYPHIMURIUM
2016-12-23	NSW	60-64	Male	S.VIRCHOW
2016-12-23	NSW	80-84	Male	S.ENTERITIDIS
2016-12-23	NT	00-04	Female	S.JOHANNESBURG
2016-12-23	NT	00-04	Male	S.KOTTBUS
2016-12-23	NT	00-04	Male	S.PARATYPHI B BV JAVA
2016-12-23	Qld	00-04	Male	UNSPECIFIED
2016-12-23	Qld	15-19	Male	S.VIRCHOW
2016-12-23	Qld	35-39	Female	S.ENTERITIDIS
2016-12-23	Qld	60-64	Female	UNSPECIFIED
2016-12-23	Qld	65-69	Female	S.WANGATA
2016-12-23	Qld	65-69	Male	S.TYPHIMURIUM
2016-12-23	Qld	65-69	Male	UNSPECIFIED
2016-12-23	Qld	80-84	Female	S.SUBSP IIIB
2016-12-23	SA	15-19	Female	S.TYPHIMURIUM
2016-12-23	SA	20-24	Female	S.TYPHIMURIUM
2016-12-23	SA	30-34	Male	S.TYPHIMURIUM
2016-12-23	Tas	10-14	Male	S.INFANTIS
2016-12-23	Tas	25-29	Male	S.TYPHIMURIUM
2016-12-23	Vic	00-04	Male	S.INFANTIS
2016-12-23	Vic	05-09	Female	S.TYPHIMURIUM
2016-12-23	Vic	05-09	Male	S.NEWPORT
2016-12-23	Vic	20-24	Male	S.DERBY
2016-12-23	Vic	30-34	Female	S.TYPHIMURIUM
2016-12-23	Vic	30-34	Male	S.TYPHIMURIUM
2016-12-23	Vic	35-39	Male	S.ABERDEEN
2016-12-23	Vic	40-44	Female	S.TYPHIMURIUM
2016-12-23	Vic	45-49	Female	S.TYPHIMURIUM
2016-12-23	Vic	50-54	Female	S.TYPHIMURIUM
2016-12-23	Vic	60-64	Female	S.TYPHIMURIUM
2016-12-23	Vic	65-69	Male	S.TYPHIMURIUM
2016-12-23	Vic	85+	Female	S.TYPHIMURIUM
2016-12-23	WA	00-04	Male	S.TYPHIMURIUM
2016-12-23	WA	30-34	Female	S.TYPHIMURIUM
2016-12-16	NSW	00-04	Female	UNSPECIFIED
2016-12-16	NSW	00-04	Male	S.INFANTIS
2016-12-16	NSW	00-04	Unknown	S.TYPHIMURIUM
2016-12-16	NSW	05-09	Female	S.TYPHIMURIUM
2016-12-16	NSW	20-24	Male	S.SAINTPAUL
2016-12-16	NSW	35-39	Male	S.PENSACOLA
2016-12-16	NSW	40-44	Female	S.TYPHIMURIUM
2016-12-16	NSW	40-44	Female	S.TYPHIMURIUM
2016-12-16	NSW	85+	Female	S.WANGATA
2016-12-16	NT	45-49	Female	UNSPECIFIED
2016-12-16	Qld	00-04	Female	S.CHESTER
2016-12-16	Qld	00-04	Female	S.VIRCHOW
2016-12-16	Qld	00-04	Female	UNSPECIFIED
2016-12-16	Qld	00-04	Male	S.HVITTINGFOSS
2016-12-16	Qld	00-04	Male	S.LITCHFIELD
2016-12-16	Qld	00-04	Male	S.MGULANI
2016-12-16	Qld	00-04	Male	S.MUENCHEN
2016-12-16	Qld	00-04	Male	UNSPECIFIED
2016-12-16	Qld	05-09	Male	S.TYPHIMURIUM
2016-12-16	Qld	05-09	Male	S.TYPHIMURIUM
2016-12-16	Qld	20-24	Female	UNSPECIFIED
2016-12-16	Qld	20-24	Male	S.SAINTPAUL
2016-12-16	Qld	25-29	Female	S.MONTEVIDEO
2016-12-16	Qld	25-29	Male	S.SAINTPAUL
2016-12-16	Qld	30-34	Female	S.POTSDAM
2016-12-16	Qld	35-39	Female	S.VIRCHOW
2016-12-16	Qld	45-49	Female	S.ZANZIBAR
2016-12-16	Qld	45-49	Male	UNSPECIFIED
2016-12-16	Qld	50-54	Female	UNSPECIFIED
2016-12-16	Qld	50-54	Male	S.VIRCHOW
2016-12-16	Qld	60-64	Female	S.BIRKENHEAD
2016-12-16	Qld	70-74	Male	S.SAINTPAUL
2016-12-16	Qld	70-74	Male	S.WAYCROSS
2016-12-16	SA	25-29	Female	S.TYPHIMURIUM
2016-12-16	SA	30-34	Male	UNSPECIFIED
2016-12-16	SA	35-39	Female	S.TYPHIMURIUM
2016-12-16	Tas	15-19	Male	S.MISSISSIPPI
2016-12-16	Vic	00-04	Male	UNSPECIFIED
2016-12-16	Vic	20-24	Female	S.ENTERITIDIS
2016-12-16	Vic	30-34	Male	S.TYPHIMURIUM
2016-12-16	Vic	30-34	Male	UNSPECIFIED
2016-12-16	Vic	65-69	Male	S.TYPHIMURIUM
2016-12-16	Vic	75-79	Female	S.TYPHIMURIUM
2016-12-16	Vic	85+	Female	S.TYPHIMURIUM
2016-12-16	WA	30-34	Female	S.NEWPORT
2016-12-16	NSW	00-04	Female	S.BAREILLY
2016-12-16	NSW	00-04	Female	S.STANLEY
2016-12-16	NSW	00-04	Female	S.WANGATA
2016-12-16	NSW	00-04	Male	S.TYPHIMURIUM
2016-12-16	NSW	00-04	Male	S.WAYCROSS
2016-12-16	NSW	05-09	Female	UNSPECIFIED
2016-12-16	NSW	10-14	Male	S.WANGATA
2016-12-16	NSW	15-19	Female	UNSPECIFIED
2016-12-16	NSW	20-24	Male	S.ENTERITIDIS
2016-12-16	NSW	25-29	Female	S.TYPHIMURIUM
2016-12-16	NSW	35-39	Female	S.TYPHIMURIUM
2016-12-16	NSW	40-44	Male	S.TYPHIMURIUM
2016-12-16	NSW	65-69	Female	S.WORTHINGTON
2016-12-16	NSW	85+	Male	S.TYPHIMURIUM
2016-12-16	Qld	00-04	Female	S.WAYCROSS
2016-12-16	Qld	00-04	Female	S.WELIKADE
2016-12-16	Qld	00-04	Male	S.BIRKENHEAD
2016-12-16	Qld	00-04	Male	S.MUENCHEN
2016-12-16	Qld	00-04	Male	S.WANGATA
2016-12-16	Qld	20-24	Female	S.POTSDAM
2016-12-16	Qld	20-24	Female	S.WELTEVREDEN
2016-12-16	Qld	35-39	Female	S.SAINTPAUL
2016-12-16	Qld	40-44	Female	S.SAINTPAUL
2016-12-16	Qld	40-44	Male	S.TYPHIMURIUM
2016-12-16	Qld	50-54	Female	UNSPECIFIED
2016-12-16	Qld	50-54	Female	UNSPECIFIED
2016-12-16	Qld	55-59	Male	UNSPECIFIED
2016-12-16	Qld	60-64	Male	S.UGANDA
2016-12-16	Qld	60-64	Male	S.ZANZIBAR
2016-12-16	Qld	65-69	Male	S.SAINTPAUL
2016-12-16	Qld	70-74	Female	UNSPECIFIED
2016-12-16	Qld	75-79	Female	S.SUBSP IIIB
2016-12-16	Qld	80-84	Female	UNSPECIFIED
2016-12-16	Qld	80-84	Male	S.ABERDEEN
2016-12-16	SA	30-34	Male	S.TYPHIMURIUM
2016-12-16	SA	35-39	Female	S.SUBSP I SER 4,5,12:I:-
2016-12-16	SA	35-39	Female	S.TYPHIMURIUM
2016-12-16	SA	35-39	Female	S.TYPHIMURIUM
2016-12-16	SA	55-59	Male	S.TYPHIMURIUM
2016-12-16	SA	70-74	Female	S.TYPHIMURIUM
2016-12-16	SA	85+	Male	S.ORANIENBURG
2016-12-16	Tas	70-74	Female	UNSPECIFIED
2016-12-16	Vic	00-04	Female	S.ORANIENBURG
2016-12-16	Vic	00-04	Male	S.WELTEVREDEN
2016-12-16	Vic	05-09	Female	S.SUBSP I SER 4,5,12:I:-
2016-12-16	Vic	20-24	Female	S.HVITTINGFOSS
2016-12-16	Vic	20-24	Male	S.PARATYPHI B BV JAVA
2016-12-16	Vic	20-24	Male	UNSPECIFIED
2016-12-16	Vic	25-29	Female	S.ENTERITIDIS
2016-12-16	Vic	25-29	Male	S.BRAENDERUP
2016-12-16	Vic	35-39	Female	UNSPECIFIED
2016-12-16	Vic	60-64	Female	S.VIRCHOW
2016-12-16	Vic	80-84	Male	UNSPECIFIED
2016-12-16	WA	00-04	Male	S.BIRKENHEAD
2016-12-16	WA	00-04	Male	S.PARATYPHI B BV JAVA
2016-12-16	WA	40-44	Female	S.ENTERITIDIS
2016-12-16	WA	40-44	Male	S.TYPHIMURIUM
2016-12-16	WA	60-64	Female	S.INFANTIS
2016-12-16	WA	65-69	Male	S.ORANIENBURG
2016-12-16	NSW	00-04	Female	S.SUBSP I SER 4,5,12:I:-
2016-12-16	NSW	00-04	Female	UNSPECIFIED
2016-12-16	NSW	00-04	Male	S.WANGATA
2016-12-16	NSW	10-14	Male	S.TYPHIMURIUM
2016-12-16	NSW	20-24	Female	S.TYPHIMURIUM
2016-12-16	NSW	25-29	Female	S.BIRKENHEAD
2016-12-16	NSW	30-34	Female	S.TYPHIMURIUM
2016-12-16	NSW	40-44	Male	UNSPECIFIED
2016-12-16	NSW	45-49	Female	S.TYPHIMURIUM
2016-12-16	NSW	50-54	Male	S.BIRKENHEAD
2016-12-16	NSW	50-54	Male	S.WANGATA
2016-12-16	NSW	70-74	Female	S.TYPHIMURIUM
2016-12-16	NSW	70-74	Female	UNSPECIFIED
2016-12-16	NSW	75-79	Female	S.POTSDAM
2016-12-16	NSW	80-84	Male	S.TYPHIMURIUM
2016-12-16	NT	15-19	Male	S.TYPHIMURIUM
2016-12-16	Qld	00-04	Female	S.CHESTER
2016-12-16	Qld	10-14	Male	UNSPECIFIED
2016-12-16	Qld	25-29	Female	S.HAVANA
2016-12-16	Qld	30-34	Female	S.VIRCHOW
2016-12-16	Qld	30-34	Male	S.SAINTPAUL
2016-12-16	Qld	35-39	Female	UNSPECIFIED
2016-12-16	Qld	40-44	Male	S.SAINTPAUL
2016-12-16	Qld	40-44	Male	UNSPECIFIED
2016-12-16	Qld	45-49	Male	UNSPECIFIED
2016-12-16	Qld	65-69	Male	S.VIRCHOW
2016-12-16	Qld	70-74	Female	S.ABERDEEN
2016-12-16	Qld	70-74	Male	S.JAVIANA
2016-12-16	Qld	75-79	Female	S.BIRKENHEAD
2016-12-16	Qld	75-79	Male	S.WELTEVREDEN
2016-12-16	SA	10-14	Male	S.TYPHIMURIUM
2016-12-16	SA	20-24	Male	S.PARATYPHI B BV JAVA
2016-12-16	SA	35-39	Male	S.STANLEY
2016-12-16	SA	35-39	Male	S.TYPHIMURIUM
2016-12-16	SA	45-49	Female	UNSPECIFIED
2016-12-16	SA	55-59	Male	S.JANGWANI
2016-12-16	SA	65-69	Female	S.HESSAREK
2016-12-16	SA	85+	Female	S.TYPHIMURIUM
2016-12-16	Vic	00-04	Male	S.BOVISMORBIFICANS
2016-12-16	Vic	05-09	Male	S.TYPHIMURIUM
2016-12-16	Vic	15-19	Male	S.SUBSP I SER 4,5,12:I:-
2016-12-16	Vic	20-24	Female	S.TYPHIMURIUM
2016-12-16	Vic	20-24	Male	S.SUBSP I SER 4,5,12:I:-
2016-12-16	Vic	35-39	Male	S.BRAENDERUP
2016-12-16	Vic	45-49	Female	S.TYPHIMURIUM
2016-12-16	Vic	50-54	Male	S.TYPHIMURIUM
2016-12-16	WA	00-04	Male	S.TYPHIMURIUM
2016-12-16	WA	20-24	Female	S.TYPHIMURIUM
2016-12-16	WA	25-29	Female	S.HAVANA
2016-12-16	WA	25-29	Male	S.TYPHIMURIUM
2016-12-16	WA	65-69	Male	S.TYPHIMURIUM
2016-12-16	NSW	00-04	Male	S.TYPHIMURIUM
2016-12-16	NSW	00-04	Male	UNSPECIFIED
2016-12-16	NSW	05-09	Female	UNSPECIFIED
2016-12-16	NSW	05-09	Male	S.TYPHIMURIUM
2016-12-16	NSW	05-09	Male	UNSPECIFIED
2016-12-16	NSW	05-09	Male	UNSPECIFIED
2016-12-16	NSW	10-14	Female	S.MONTEVIDEO
2016-12-16	NSW	20-24	Female	S.SAINTPAUL
2016-12-16	NSW	20-24	Female	S.ZANZIBAR
2016-12-16	NSW	25-29	Female	S.SUBSP I SER 4,5,12:I:-
2016-12-16	NSW	25-29	Male	S.TYPHIMURIUM
2016-12-16	NSW	25-29	Male	S.TYPHIMURIUM
2016-12-16	NSW	30-34	Female	S.TYPHIMURIUM
2016-12-16	NSW	30-34	Male	UNSPECIFIED
2016-12-16	NSW	35-39	Female	S.EASTBOURNE
2016-12-16	NSW	40-44	Male	S.TYPHIMURIUM
2016-12-16	NSW	40-44	Male	UNSPECIFIED
2016-12-16	NSW	45-49	Female	S.SAINTPAUL
2016-12-16	NSW	55-59	Male	S.TYPHIMURIUM
2016-12-16	NSW	70-74	Female	UNSPECIFIED
2016-12-16	NT	00-04	Male	S.WELTEVREDEN
2016-12-16	Qld	00-04	Female	S.ABERDEEN
2016-12-16	Qld	00-04	Male	S.LONDON
2016-12-16	Qld	00-04	Male	S.POTSDAM
2016-12-16	Qld	00-04	Male	UNSPECIFIED
2016-12-16	Qld	05-09	Male	S.SAINTPAUL
2016-12-16	Qld	05-09	Male	S.SAINTPAUL
2016-12-16	Qld	15-19	Female	S.TYPHIMURIUM
2016-12-16	Qld	30-34	Female	S.VIRCHOW
2016-12-16	Qld	35-39	Male	S.TYPHIMURIUM
2016-12-16	Qld	40-44	Female	S.WELTEVREDEN
2016-12-16	Qld	40-44	Male	S.VIRCHOW
2016-12-16	Qld	45-49	Male	S.WELTEVREDEN
2016-12-16	Qld	45-49	Male	UNSPECIFIED
2016-12-16	Qld	50-54	Male	UNSPECIFIED
2016-12-16	Qld	60-64	Male	UNSPECIFIED
2016-12-16	Qld	75-79	Female	S.LITCHFIELD
2016-12-16	SA	00-04	Male	S.HESSAREK
2016-12-16	SA	05-09	Male	S.TYPHIMURIUM
2016-12-16	Vic	00-04	Female	S.WELTEVREDEN
2016-12-16	Vic	00-04	Male	S.TYPHIMURIUM
2016-12-16	Vic	00-04	Male	S.TYPHIMURIUM
2016-12-16	Vic	05-09	Female	S.TYPHIMURIUM
2016-12-16	Vic	05-09	Female	S.TYPHIMURIUM
2016-12-16	Vic	15-19	Female	S.SUBSP I SER 4,5,12:I:-
2016-12-16	Vic	20-24	Female	S.TYPHIMURIUM
2016-12-16	Vic	25-29	Female	S.TYPHIMURIUM
2016-12-16	Vic	35-39	Male	S.TYPHIMURIUM
2016-12-16	Vic	40-44	Female	UNSPECIFIED
2016-12-16	Vic	45-49	Female	S.TYPHIMURIUM
2016-12-16	Vic	45-49	Male	S.TYPHIMURIUM
2016-12-16	Vic	50-54	Male	S.BRAENDERUP
2016-12-16	Vic	55-59	Male	S.ANATUM
2016-12-16	Vic	55-59	Male	S.TYPHIMURIUM
2016-12-16	WA	00-04	Male	S.KENTUCKY
2016-12-16	WA	05-09	Female	S.TYPHIMURIUM
2016-12-16	WA	10-14	Male	S.TYPHIMURIUM
2016-12-16	WA	10-14	Male	S.TYPHIMURIUM
2016-12-16	WA	20-24	Female	S.PARATYPHI B BV JAVA
2016-12-16	WA	20-24	Female	S.TYPHIMURIUM
2016-12-16	WA	65-69	Female	S.DERBY
2016-12-16	NSW	00-04	Female	S.TYPHIMURIUM
2016-12-16	NSW	00-04	Male	S.CHESTER
2016-12-16	NSW	15-19	Female	S.TYPHIMURIUM
2016-12-16	NSW	15-19	Male	S.TYPHIMURIUM
2016-12-16	NSW	20-24	Female	S.ENTERITIDIS
2016-12-16	NSW	25-29	Female	S.ENTERITIDIS
2016-12-16	NSW	25-29	Male	S.TYPHIMURIUM
2016-12-16	NSW	55-59	Female	S.ENTERITIDIS
2016-12-16	NSW	60-64	Female	S.PARATYPHI B BV JAVA
2016-12-16	Qld	10-14	Male	S.SAINTPAUL
2016-12-16	Qld	50-54	Female	S.TYPHIMURIUM
2016-12-16	Qld	60-64	Female	S.ANATUM
2016-12-16	Qld	60-64	Female	S.JAVIANA
2016-12-16	Qld	65-69	Female	S.ENTERITIDIS
2016-12-16	Qld	65-69	Male	S.ENTERITIDIS
2016-12-16	SA	00-04	Female	S.CHESTER
2016-12-16	SA	00-04	Female	S.TYPHIMURIUM
2016-12-16	SA	05-09	Female	S.TYPHIMURIUM
2016-12-16	SA	55-59	Female	S.TYPHIMURIUM
2016-12-16	Vic	00-04	Male	S.TYPHIMURIUM
2016-12-16	Vic	05-09	Male	S.SAINTPAUL
2016-12-16	Vic	15-19	Male	S.TYPHIMURIUM
2016-12-16	Vic	25-29	Female	S.TYPHIMURIUM
2016-12-16	Vic	45-49	Female	S.TYPHIMURIUM
2016-12-16	Vic	80-84	Male	S.TYPHIMURIUM
2016-12-16	WA	00-04	Male	S.SAINTPAUL
2016-12-16	WA	00-04	Male	S.TYPHIMURIUM
2016-12-16	WA	15-19	Male	S.TYPHIMURIUM
2016-12-16	WA	25-29	Female	S.ENTERITIDIS
2016-12-16	WA	25-29	Female	S.WELTEVREDEN
2016-12-16	WA	30-34	Female	S.TYPHIMURIUM
2016-12-16	WA	55-59	Female	S.TYPHIMURIUM
2016-12-16	WA	55-59	Male	S.TYPHIMURIUM
2016-12-16	WA	60-64	Female	S.TYPHIMURIUM
2016-12-16	NSW	00-04	Female	UNSPECIFIED
2016-12-16	NSW	00-04	Female	UNSPECIFIED
2016-12-16	NSW	00-04	Male	S.READING
2016-12-16	NSW	05-09	Male	S.ENTERITIDIS
2016-12-16	NSW	05-09	Male	UNSPECIFIED
2016-12-16	NSW	20-24	Female	S.SUBSP I SER 4,5,12:I:-
2016-12-16	NSW	20-24	Female	S.TYPHIMURIUM
2016-12-16	NSW	25-29	Male	S.CHAILEY
2016-12-16	NSW	25-29	Male	S.TYPHIMURIUM
2016-12-16	NSW	40-44	Female	UNSPECIFIED
2016-12-16	NSW	50-54	Female	S.WELTEVREDEN
2016-12-16	NSW	50-54	Female	UNSPECIFIED
2016-12-16	NSW	55-59	Female	S.BIRKENHEAD
2016-12-16	NSW	55-59	Female	S.TYPHIMURIUM
2016-12-16	NSW	55-59	Female	UNSPECIFIED
2016-12-16	NSW	55-59	Male	S.TYPHIMURIUM
2016-12-16	NSW	65-69	Male	S.BIRKENHEAD
2016-12-16	NSW	70-74	Female	S.ENTERITIDIS
2016-12-16	NT	00-04	Female	S.MUENCHEN
2016-12-16	NT	10-14	Female	S.ANATUM
2016-12-16	NT	55-59	Female	S.ENTERITIDIS
2016-12-16	Qld	00-04	Female	S.TYPHIMURIUM
2016-12-16	Qld	00-04	Male	S.WELTEVREDEN
2016-12-16	Qld	20-24	Female	S.MUENCHEN
2016-12-16	Qld	30-34	Male	S.TYPHIMURIUM
2016-12-16	Qld	50-54	Male	S.TYPHIMURIUM
2016-12-16	Qld	55-59	Male	UNSPECIFIED
2016-12-16	SA	00-04	Male	S.STANLEY
2016-12-16	SA	10-14	Female	S.TYPHIMURIUM
2016-12-16	SA	80-84	Male	S.INFANTIS
2016-12-16	Vic	00-04	Female	S.FREMANTLE
2016-12-16	Vic	00-04	Female	S.SUBSP I SER 16:L,V:-
2016-12-16	Vic	05-09	Male	S.TYPHIMURIUM
2016-12-16	Vic	10-14	Male	S.TYPHIMURIUM
2016-12-16	Vic	15-19	Male	UNSPECIFIED
2016-12-16	Vic	20-24	Female	S.MGULANI
2016-12-16	Vic	30-34	Male	S.TYPHIMURIUM
2016-12-16	Vic	45-49	Female	S.PARATYPHI B BV JAVA
2016-12-16	Vic	45-49	Female	S.TYPHIMURIUM
2016-12-16	Vic	50-54	Female	S.JAVIANA
2016-12-16	Vic	55-59	Female	S.TYPHIMURIUM
2016-12-16	Vic	60-64	Male	S.TYPHIMURIUM
2016-12-16	WA	00-04	Female	S.MUENCHEN
2016-12-16	WA	00-04	Female	S.TYPHIMURIUM
2016-12-16	WA	00-04	Female	S.TYPHIMURIUM
2016-12-16	WA	00-04	Male	S.SENFTENBERG
2016-12-16	WA	20-24	Male	S.ENTERITIDIS
2016-12-16	WA	35-39	Male	S.TYPHIMURIUM
2016-12-16	WA	40-44	Male	S.ENTERITIDIS
2016-12-16	WA	50-54	Female	S.TYPHIMURIUM
2016-12-16	WA	65-69	Female	UNSPECIFIED
2016-12-16	WA	80-84	Female	S.BOVISMORBIFICANS
2016-12-16	NSW	00-04	Male	S.LANSING
2016-12-16	NSW	00-04	Male	S.PARATYPHI B BV JAVA
2016-12-16	NSW	00-04	Male	S.TYPHIMURIUM
2016-12-16	NSW	00-04	Male	S.TYPHIMURIUM
2016-12-16	NSW	00-04	Male	UNSPECIFIED
2016-12-16	NSW	10-14	Male	S.TYPHIMURIUM
2016-12-16	NSW	20-24	Female	S.TYPHIMURIUM
2016-12-16	NSW	25-29	Female	S.TYPHIMURIUM
2016-12-16	NSW	25-29	Male	S.BOVISMORBIFICANS
2016-12-16	NSW	30-34	Female	S.NEWPORT
2016-12-16	NSW	35-39	Male	S.TYPHIMURIUM
2016-12-16	NSW	45-49	Female	S.TYPHIMURIUM
2016-12-16	NSW	50-54	Female	UNSPECIFIED
2016-12-16	NSW	50-54	Male	S.TYPHIMURIUM
2016-12-16	NSW	55-59	Female	S.SAINTPAUL
2016-12-16	NSW	65-69	Male	S.TYPHIMURIUM
2016-12-16	NSW	80-84	Female	S.LITCHFIELD
2016-12-16	NSW	80-84	Male	S.GIVE
2016-12-16	NSW	85+	Male	S.CHESTER
2016-12-16	NSW	85+	Male	S.INFANTIS
2016-12-16	NT	00-04	Female	S.EMMASTAD
2016-12-16	NT	00-04	Male	S.LANSING
2016-12-16	NT	25-29	Female	UNSPECIFIED
2016-12-16	Qld	00-04	Female	S.CHAILEY
2016-12-16	Qld	00-04	Female	UNSPECIFIED
2016-12-16	Qld	00-04	Male	UNSPECIFIED
2016-12-16	Qld	05-09	Female	S.CHESTER
2016-12-16	Qld	60-64	Female	S.WELTEVREDEN
2016-12-16	Qld	70-74	Male	S.MUENCHEN
2016-12-16	SA	00-04	Female	S.TYPHIMURIUM
2016-12-16	SA	15-19	Female	S.PARATYPHI B BV JAVA
2016-12-16	SA	55-59	Female	S.VIRCHOW
2016-12-16	SA	70-74	Female	S.TYPHIMURIUM
2016-12-16	SA	80-84	Male	S.TYPHIMURIUM
2016-12-16	Vic	00-04	Female	S.OHIO
2016-12-16	Vic	00-04	Female	S.TYPHIMURIUM
2016-12-16	Vic	15-19	Male	UNSPECIFIED
2016-12-16	Vic	20-24	Male	S.VIRCHOW
2016-12-16	Vic	25-29	Male	S.STANLEY
2016-12-16	Vic	25-29	Male	S.TYPHIMURIUM
2016-12-16	Vic	30-34	Male	S.TYPHIMURIUM
2016-12-16	Vic	45-49	Male	S.VIRCHOW
2016-12-16	Vic	50-54	Female	S.TYPHIMURIUM
2016-12-16	Vic	55-59	Female	S.TYPHIMURIUM
2016-12-16	Vic	60-64	Male	S.TYPHIMURIUM
2016-12-16	Vic	85+	Female	S.SOFIA
2016-12-16	WA	00-04	Female	S.TYPHIMURIUM
2016-12-16	WA	15-19	Male	S.TYPHIMURIUM
2016-12-16	WA	20-24	Male	S.STANLEY
2016-12-16	WA	35-39	Female	S.TYPHIMURIUM
2016-12-16	WA	50-54	Female	S.ENTERITIDIS
2016-12-16	WA	75-79	Female	S.TYPHIMURIUM
2016-12-09	NSW	00-04	Female	S.ORION
2016-12-09	NSW	00-04	Female	S.TYPHIMURIUM
2016-12-09	NSW	00-04	Male	S.SUBSP I SER 4,5,12:I:-
2016-12-09	NSW	05-09	Male	S.TYPHIMURIUM
2016-12-09	NSW	15-19	Female	S.SUBSP I SER 4,5,12:I:-
2016-12-09	NSW	20-24	Female	S.TYPHIMURIUM
2016-12-09	NSW	25-29	Male	S.CHESTER
2016-12-09	NSW	30-34	Female	S.ENTERITIDIS
2016-12-09	NSW	30-34	Female	S.KENTUCKY
2016-12-09	NSW	45-49	Male	S.TYPHIMURIUM
2016-12-09	NSW	55-59	Female	UNSPECIFIED
2016-12-09	NSW	70-74	Male	UNSPECIFIED
2016-12-09	NT	35-39	Female	S.HEIDELBERG
2016-12-09	NT	50-54	Female	S.HVITTINGFOSS
2016-12-09	Qld	00-04	Female	S.ABERDEEN
2016-12-09	Qld	00-04	Female	S.MGULANI
2016-12-09	Qld	00-04	Female	S.VIRCHOW
2016-12-09	Qld	00-04	Female	UNSPECIFIED
2016-12-09	Qld	00-04	Female	UNSPECIFIED
2016-12-09	Qld	00-04	Male	S.TYPHIMURIUM
2016-12-09	Qld	00-04	Male	UNSPECIFIED
2016-12-09	Qld	15-19	Female	S.BOVISMORBIFICANS
2016-12-09	Qld	15-19	Male	S.SAINTPAUL
2016-12-09	Qld	15-19	Male	UNSPECIFIED
2016-12-09	Qld	20-24	Female	S.TYPHIMURIUM
2016-12-09	Qld	20-24	Female	UNSPECIFIED
2016-12-09	Qld	25-29	Female	UNSPECIFIED
2016-12-09	Qld	25-29	Male	S.SAINTPAUL
2016-12-09	Qld	40-44	Female	S.TYPHIMURIUM
2016-12-09	Qld	40-44	Male	S.WELIKADE
2016-12-09	Qld	45-49	Female	S.TYPHIMURIUM
2016-12-09	Qld	50-54	Male	S.ENTERITIDIS
2016-12-09	Qld	50-54	Male	S.SAINTPAUL
2016-12-09	Qld	50-54	Male	UNSPECIFIED
2016-12-09	Qld	60-64	Female	S.WELTEVREDEN
2016-12-09	Qld	60-64	Male	S.KIAMBU
2016-12-09	Qld	70-74	Male	UNSPECIFIED
2016-12-09	Tas	60-64	Male	S.MISSISSIPPI
2016-12-09	Vic	00-04	Female	S.TYPHIMURIUM
2016-12-09	Vic	00-04	Male	S.ORIENTALIS
2016-12-09	Vic	00-04	Male	S.SUBSP IIIB SER 65:L,V:Z53
2016-12-09	Vic	00-04	Male	S.TYPHIMURIUM
2016-12-09	Vic	00-04	Male	S.TYPHIMURIUM
2016-12-09	Vic	00-04	Male	S.TYPHIMURIUM
2016-12-09	Vic	00-04	Male	S.TYPHIMURIUM
2016-12-09	Vic	10-14	Male	S.SUBSP I SER 4,5,12:I:-
2016-12-09	Vic	20-24	Female	S.PARATYPHI B BV JAVA
2016-12-09	Vic	20-24	Female	S.TYPHIMURIUM
2016-12-09	Vic	20-24	Female	S.TYPHIMURIUM
2016-12-09	Vic	20-24	Female	S.TYPHIMURIUM
2016-12-09	Vic	25-29	Male	S.CORVALLIS
2016-12-09	Vic	30-34	Male	S.TYPHIMURIUM
2016-12-09	Vic	50-54	Female	S.TYPHIMURIUM
2016-12-09	Vic	60-64	Female	S.AGONA
2016-12-09	Vic	70-74	Female	S.TYPHIMURIUM
2016-12-09	Vic	70-74	Male	S.TYPHIMURIUM
2016-12-09	WA	15-19	Male	S.SINGAPORE
2016-12-09	WA	25-29	Female	S.WELTEVREDEN
2016-12-09	WA	45-49	Female	S.TYPHIMURIUM
2016-12-09	WA	80-84	Male	S.TYPHIMURIUM
2016-12-09	NSW	00-04	Female	S.ANATUM
2016-12-09	NSW	00-04	Female	S.SUBSP I SER 4,5,12:I:-
2016-12-09	NSW	00-04	Female	S.TYPHIMURIUM
2016-12-09	NSW	00-04	Female	S.TYPHIMURIUM
2016-12-09	NSW	00-04	Female	S.TYPHIMURIUM
2016-12-09	NSW	00-04	Male	S.BIRKENHEAD
2016-12-09	NSW	00-04	Male	S.INFANTIS
2016-12-09	NSW	00-04	Male	S.MUENCHEN
2016-12-09	NSW	20-24	Female	S.NEWPORT
2016-12-09	NSW	20-24	Female	S.SAINTPAUL
2016-12-09	NSW	20-24	Female	S.TYPHIMURIUM
2016-12-09	NSW	20-24	Female	S.TYPHIMURIUM
2016-12-09	NSW	25-29	Female	S.TYPHIMURIUM
2016-12-09	NSW	30-34	Male	UNSPECIFIED
2016-12-09	NSW	35-39	Male	S.TYPHIMURIUM
2016-12-09	NSW	35-39	Male	S.TYPHIMURIUM
2016-12-09	NSW	40-44	Female	S.SAINTPAUL
2016-12-09	NSW	40-44	Female	S.TYPHIMURIUM
2016-12-09	NSW	45-49	Female	S.TYPHIMURIUM
2016-12-09	NSW	45-49	Male	S.TYPHIMURIUM
2016-12-09	NSW	45-49	Male	S.TYPHIMURIUM
2016-12-09	NSW	50-54	Male	S.BIRKENHEAD
2016-12-09	NSW	50-54	Male	S.TYPHIMURIUM
2016-12-09	NSW	55-59	Female	S.CHARITY
2016-12-09	NSW	55-59	Male	S.WANGATA
2016-12-09	NSW	55-59	Male	UNSPECIFIED
2016-12-09	NSW	70-74	Female	S.TYPHIMURIUM
2016-12-09	NSW	85+	Female	S.TYPHIMURIUM
2016-12-09	NT	00-04	Female	S.VIRCHOW
2016-12-09	NT	00-04	Male	S.CERRO
2016-12-09	NT	55-59	Female	S.LITCHFIELD
2016-12-09	Qld	00-04	Female	S.TYPHIMURIUM
2016-12-09	Qld	00-04	Female	UNSPECIFIED
2016-12-09	Qld	00-04	Male	S.ABERDEEN
2016-12-09	Qld	00-04	Male	S.TYPHIMURIUM
2016-12-09	Qld	00-04	Male	UNSPECIFIED
2016-12-09	Qld	05-09	Female	S.TYPHIMURIUM
2016-12-09	Qld	10-14	Female	S.TYPHIMURIUM
2016-12-09	Qld	15-19	Female	S.SAINTPAUL
2016-12-09	Qld	25-29	Female	S.SAINTPAUL
2016-12-09	Qld	40-44	Female	UNSPECIFIED
2016-12-09	Qld	50-54	Female	UNSPECIFIED
2016-12-09	Qld	55-59	Female	S.CHESTER
2016-12-09	Qld	60-64	Female	S.SUBSP IIIB
2016-12-09	Qld	75-79	Female	UNSPECIFIED
2016-12-09	SA	00-04	Male	S.SUBSP I SER 4,12:I:-
2016-12-09	SA	00-04	Male	UNSPECIFIED
2016-12-09	Tas	45-49	Male	UNSPECIFIED
2016-12-09	Vic	00-04	Male	S.TYPHIMURIUM
2016-12-09	Vic	00-04	Male	S.TYPHIMURIUM
2016-12-09	Vic	05-09	Male	S.TYPHIMURIUM
2016-12-09	Vic	10-14	Male	S.TYPHIMURIUM
2016-12-09	Vic	20-24	Female	S.TYPHIMURIUM
2016-12-09	Vic	25-29	Female	S.TYPHIMURIUM
2016-12-09	Vic	25-29	Female	S.TYPHIMURIUM
2016-12-09	Vic	60-64	Male	S.TYPHIMURIUM
2016-12-09	WA	00-04	Female	S.TYPHIMURIUM
2016-12-09	WA	30-34	Male	S.ENTERITIDIS
2016-12-09	WA	35-39	Female	S.GIVE
2016-12-09	WA	35-39	Male	S.VIRCHOW
2016-12-09	NSW	00-04	Male	S.MONTEVIDEO
2016-12-09	NSW	20-24	Female	S.TYPHIMURIUM
2016-12-09	NSW	25-29	Male	S.TYPHIMURIUM
2016-12-09	NSW	30-34	Male	S.TYPHIMURIUM
2016-12-09	NSW	35-39	Male	S.TYPHIMURIUM
2016-12-09	NSW	45-49	Male	S.TYPHIMURIUM
2016-12-09	NSW	60-64	Female	S.EASTBOURNE
2016-12-09	NSW	70-74	Male	S.STANLEY
2016-12-09	NT	00-04	Female	S.VIRCHOW
2016-12-09	NT	15-19	Female	UNSPECIFIED
2016-12-09	Qld	00-04	Male	S.SUBSP I
2016-12-09	Qld	00-04	Male	S.SUBSP I
2016-12-09	Qld	00-04	Male	S.WELTEVREDEN
2016-12-09	Qld	10-14	Male	S.READING
2016-12-09	Qld	10-14	Male	UNSPECIFIED
2016-12-09	Qld	20-24	Male	S.READING
2016-12-09	Qld	35-39	Female	S.LITCHFIELD
2016-12-09	Qld	45-49	Female	S.READING
2016-12-09	Qld	50-54	Female	S.TYPHIMURIUM
2016-12-09	Qld	50-54	Male	S.MUENCHEN
2016-12-09	Qld	55-59	Male	S.SAINTPAUL
2016-12-09	Qld	60-64	Male	S.ABERDEEN
2016-12-09	Qld	60-64	Male	S.CHAILEY
2016-12-09	Qld	65-69	Female	UNSPECIFIED
2016-12-09	Qld	85+	Female	UNSPECIFIED
2016-12-09	SA	50-54	Male	S.HESSAREK
2016-12-09	SA	60-64	Female	UNSPECIFIED
2016-12-09	Vic	00-04	Female	S.TYPHIMURIUM
2016-12-09	Vic	00-04	Male	S.TYPHIMURIUM
2016-12-09	Vic	00-04	Male	S.TYPHIMURIUM
2016-12-09	Vic	10-14	Female	S.TYPHIMURIUM
2016-12-09	Vic	10-14	Female	S.TYPHIMURIUM
2016-12-09	Vic	15-19	Male	S.TYPHIMURIUM
2016-12-09	Vic	15-19	Male	S.TYPHIMURIUM
2016-12-09	Vic	20-24	Female	S.AGONA
2016-12-09	Vic	20-24	Female	S.TYPHIMURIUM
2016-12-09	Vic	20-24	Female	S.TYPHIMURIUM
2016-12-09	Vic	20-24	Female	S.TYPHIMURIUM
2016-12-09	Vic	20-24	Male	S.ENTERITIDIS
2016-12-09	Vic	25-29	Female	S.TYPHIMURIUM
2016-12-09	Vic	25-29	Male	S.TYPHIMURIUM
2016-12-09	Vic	30-34	Female	S.TYPHIMURIUM
2016-12-09	Vic	30-34	Female	S.TYPHIMURIUM
2016-12-09	Vic	30-34	Female	UNSPECIFIED
2016-12-09	Vic	30-34	Male	S.ENTERITIDIS
2016-12-09	Vic	30-34	Male	S.STANLEY
2016-12-09	Vic	35-39	Female	S.TYPHIMURIUM
2016-12-09	Vic	45-49	Female	S.INFANTIS
2016-12-09	Vic	45-49	Male	S.TYPHIMURIUM
2016-12-09	Vic	60-64	Female	S.TYPHIMURIUM
2016-12-09	WA	00-04	Male	S.ENTERITIDIS
2016-12-09	WA	40-44	Female	S.TYPHIMURIUM
2016-12-09	WA	40-44	Male	S.TYPHIMURIUM
2016-12-09	NSW	00-04	Female	S.INFANTIS
2016-12-09	NSW	00-04	Female	UNSPECIFIED
2016-12-09	NSW	00-04	Male	S.BAREILLY
2016-12-09	NSW	00-04	Male	S.TYPHIMURIUM
2016-12-09	NSW	00-04	Male	S.TYPHIMURIUM
2016-12-09	NSW	05-09	Female	S.TYPHIMURIUM
2016-12-09	NSW	25-29	Male	S.VIRCHOW
2016-12-09	NSW	30-34	Female	S.TYPHIMURIUM
2016-12-09	NSW	30-34	Female	S.TYPHIMURIUM
2016-12-09	NSW	30-34	Male	S.TYPHIMURIUM
2016-12-09	NSW	30-34	Male	S.TYPHIMURIUM
2016-12-09	NSW	30-34	Male	S.TYPHIMURIUM
2016-12-09	NSW	35-39	Female	S.TYPHIMURIUM
2016-12-09	NSW	45-49	Female	S.CERRO
2016-12-09	NSW	60-64	Male	S.BOVISMORBIFICANS
2016-12-09	NSW	65-69	Female	S.TYPHIMURIUM
2016-12-09	NT	00-04	Female	S.SUBSP I ROUGH:I:1,
2016-12-09	NT	00-04	Male	S.BUKAVU
2016-12-09	NT	05-09	Male	UNSPECIFIED
2016-12-09	NT	30-34	Female	S.INFANTIS
2016-12-09	NT	40-44	Female	S.TYPHIMURIUM
2016-12-09	NT	70-74	Male	S.SAINTPAUL
2016-12-09	Qld	00-04	Female	S.TYPHIMURIUM
2016-12-09	Qld	00-04	Male	S.SUBSP I
2016-12-09	Qld	00-04	Male	S.TYPHIMURIUM
2016-12-09	Qld	00-04	Male	S.WAYCROSS
2016-12-09	Qld	20-24	Female	UNSPECIFIED
2016-12-09	Qld	20-24	Male	S.CHESTER
2016-12-09	Qld	35-39	Male	S.TYPHIMURIUM
2016-12-09	Qld	40-44	Male	S.SAINTPAUL
2016-12-09	Qld	45-49	Male	S.HVITTINGFOSS
2016-12-09	Qld	50-54	Female	S.TYPHIMURIUM
2016-12-09	Qld	50-54	Male	UNSPECIFIED
2016-12-09	Qld	60-64	Female	UNSPECIFIED
2016-12-09	Qld	65-69	Female	UNSPECIFIED
2016-12-09	Qld	70-74	Female	UNSPECIFIED
2016-12-09	Qld	70-74	Male	UNSPECIFIED
2016-12-09	Qld	75-79	Male	UNSPECIFIED
2016-12-09	SA	10-14	Male	S.TYPHIMURIUM
2016-12-09	SA	45-49	Female	S.SUBSP I SER 4,5,12:I:-
2016-12-09	Vic	00-04	Female	UNSPECIFIED
2016-12-09	Vic	00-04	Male	S.INFANTIS
2016-12-09	Vic	00-04	Male	S.TYPHIMURIUM
2016-12-09	Vic	00-04	Male	S.TYPHIMURIUM
2016-12-09	Vic	05-09	Male	S.STANLEY
2016-12-09	Vic	05-09	Male	S.TYPHIMURIUM
2016-12-09	Vic	20-24	Female	S.TYPHIMURIUM
2016-12-09	Vic	20-24	Female	S.TYPHIMURIUM
2016-12-09	Vic	20-24	Male	S.TYPHIMURIUM
2016-12-09	Vic	25-29	Female	S.TYPHIMURIUM
2016-12-09	Vic	25-29	Female	S.TYPHIMURIUM
2016-12-09	Vic	25-29	Male	S.CHESTER
2016-12-09	Vic	25-29	Male	S.TYPHIMURIUM
2016-12-09	Vic	30-34	Female	S.TYPHIMURIUM
2016-12-09	Vic	30-34	Female	S.TYPHIMURIUM
2016-12-09	Vic	30-34	Female	S.TYPHIMURIUM
2016-12-09	Vic	30-34	Female	S.TYPHIMURIUM
2016-12-09	Vic	35-39	Female	S.PARATYPHI B BV JAVA
2016-12-09	Vic	35-39	Female	S.TYPHIMURIUM
2016-12-09	Vic	35-39	Female	S.TYPHIMURIUM
2016-12-09	Vic	35-39	Male	S.INFANTIS
2016-12-09	Vic	35-39	Male	S.SUBSP I SER 16:L,V:-
2016-12-09	Vic	35-39	Male	S.TYPHIMURIUM
2016-12-09	Vic	40-44	Female	S.TYPHIMURIUM
2016-12-09	Vic	40-44	Male	S.SAINTPAUL
2016-12-09	Vic	40-44	Male	S.TYPHIMURIUM
2016-12-09	Vic	45-49	Male	S.TYPHIMURIUM
2016-12-09	Vic	45-49	Male	S.TYPHIMURIUM
2016-12-09	Vic	50-54	Female	S.OHIO
2016-12-09	Vic	55-59	Female	S.ENTERITIDIS
2016-12-09	Vic	60-64	Male	S.MELEAGRIDIS
2016-12-09	Vic	80-84	Male	S.TYPHIMURIUM
2016-12-09	Vic	85+	Male	S.INFANTIS
2016-12-09	WA	00-04	Female	S.TYPHIMURIUM
2016-12-09	WA	00-04	Male	S.TENNESSEE
2016-12-09	WA	00-04	Male	S.TYPHIMURIUM
2016-12-09	WA	15-19	Female	S.TYPHIMURIUM
2016-12-09	WA	20-24	Female	S.TYPHIMURIUM
2016-12-09	WA	30-34	Female	S.TYPHIMURIUM
2016-12-09	WA	30-34	Female	S.TYPHIMURIUM
2016-12-09	WA	30-34	Female	S.VIRCHOW
2016-12-09	WA	30-34	Male	S.TYPHIMURIUM
2016-12-09	WA	40-44	Male	S.ENTERITIDIS
2016-12-09	WA	50-54	Male	S.TYPHIMURIUM
2016-12-09	WA	70-74	Male	S.TYPHIMURIUM
2016-12-09	NSW	00-04	Female	S.TYPHIMURIUM
2016-12-09	NSW	00-04	Male	S.BAREILLY
2016-12-09	NSW	05-09	Female	S.BOVISMORBIFICANS
2016-12-09	NSW	20-24	Male	S.STANLEY
2016-12-09	NSW	25-29	Female	S.VIRCHOW
2016-12-09	NSW	25-29	Male	S.TYPHIMURIUM
2016-12-09	NSW	25-29	Male	S.TYPHIMURIUM
2016-12-09	NSW	30-34	Male	S.ENTERITIDIS
2016-12-09	NSW	40-44	Female	S.TYPHIMURIUM
2016-12-09	NSW	40-44	Male	S.TYPHIMURIUM
2016-12-09	NSW	45-49	Female	S.TYPHIMURIUM
2016-12-09	NSW	45-49	Male	S.INFANTIS
2016-12-09	NSW	45-49	Male	S.TYPHIMURIUM
2016-12-09	NSW	45-49	Male	S.TYPHIMURIUM
2016-12-09	NSW	45-49	Male	S.TYPHIMURIUM
2016-12-09	NSW	45-49	Male	S.VIRCHOW
2016-12-09	NSW	50-54	Female	S.TYPHIMURIUM
2016-12-09	NSW	50-54	Female	S.TYPHIMURIUM
2016-12-09	NSW	55-59	Male	S.ENTERITIDIS
2016-12-09	NSW	60-64	Female	UNSPECIFIED
2016-12-09	NSW	60-64	Male	S.TYPHIMURIUM
2016-12-09	NSW	65-69	Female	S.TYPHIMURIUM
2016-12-09	NSW	80-84	Female	UNSPECIFIED
2016-12-09	NT	05-09	Male	S.SAINTPAUL
2016-12-09	NT	50-54	Female	S.SUBSP I SER 4,5,12:-:1,2
2016-12-09	NT	80-84	Female	S.TYPHIMURIUM
2016-12-09	Qld	05-09	Female	UNSPECIFIED
2016-12-09	Qld	45-49	Female	S.MUENCHEN
2016-12-09	Qld	55-59	Male	S.THOMPSON
2016-12-09	Qld	85+	Male	S.SAINTPAUL
2016-12-09	SA	35-39	Female	S.TYPHIMURIUM
2016-12-09	SA	70-74	Female	S.TYPHIMURIUM
2016-12-09	Tas	00-04	Female	S.MISSISSIPPI
2016-12-09	Tas	00-04	Female	S.MISSISSIPPI
2016-12-09	Vic	00-04	Female	S.TYPHIMURIUM
2016-12-09	Vic	00-04	Female	S.TYPHIMURIUM
2016-12-09	Vic	25-29	Female	S.TYPHIMURIUM
2016-12-09	Vic	25-29	Male	S.TYPHIMURIUM
2016-12-09	Vic	30-34	Female	UNSPECIFIED
2016-12-09	Vic	35-39	Female	S.TYPHIMURIUM
2016-12-09	Vic	35-39	Male	S.TYPHIMURIUM
2016-12-09	Vic	60-64	Female	S.TYPHIMURIUM
2016-12-09	WA	00-04	Female	S.TYPHIMURIUM
2016-12-09	WA	00-04	Male	S.TYPHIMURIUM
2016-12-09	WA	05-09	Female	S.TYPHIMURIUM
2016-12-09	WA	20-24	Female	S.TYPHIMURIUM
2016-12-09	WA	45-49	Female	S.VIRCHOW
2016-12-09	NSW	00-04	Female	S.TYPHIMURIUM
2016-12-09	NSW	00-04	Female	S.WANGATA
2016-12-09	NSW	15-19	Female	S.BAHRENFELD
2016-12-09	NSW	20-24	Female	S.WANGATA
2016-12-09	NSW	30-34	Male	S.TYPHIMURIUM
2016-12-09	NSW	30-34	Male	S.VIRCHOW
2016-12-09	NSW	40-44	Female	S.TYPHIMURIUM
2016-12-09	NSW	40-44	Male	S.TYPHIMURIUM
2016-12-09	NSW	45-49	Female	S.TYPHIMURIUM
2016-12-09	NSW	50-54	Male	S.TYPHIMURIUM
2016-12-09	NSW	55-59	Male	S.BOVISMORBIFICANS
2016-12-09	NSW	60-64	Female	UNSPECIFIED
2016-12-09	NSW	80-84	Female	S.BAREILLY
2016-12-09	NSW	85+	Female	S.CHESTER
2016-12-09	NT	00-04	Male	S.BALL
2016-12-09	NT	00-04	Male	S.LANSING
2016-12-09	NT	20-24	Female	S.TYPHIMURIUM
2016-12-09	Qld	00-04	Female	UNSPECIFIED
2016-12-09	Qld	00-04	Female	UNSPECIFIED
2016-12-09	Qld	00-04	Male	UNSPECIFIED
2016-12-09	Qld	35-39	Female	UNSPECIFIED
2016-12-09	Qld	65-69	Female	S.ADELAIDE
2016-12-09	Qld	65-69	Male	S.WANGATA
2016-12-09	SA	00-04	Female	UNSPECIFIED
2016-12-09	SA	35-39	Male	S.OHIO
2016-12-09	SA	60-64	Male	UNSPECIFIED
2016-12-09	SA	80-84	Female	S.TYPHIMURIUM
2016-12-09	Vic	15-19	Male	S.TYPHIMURIUM
2016-12-09	Vic	25-29	Male	S.TYPHIMURIUM
2016-12-09	Vic	30-34	Male	S.STANLEY
2016-12-09	Vic	30-34	Male	S.TYPHIMURIUM
2016-12-09	Vic	50-54	Female	S.TYPHIMURIUM
2016-12-09	Vic	70-74	Male	S.TENNESSEE
2016-12-09	WA	00-04	Male	S.ABERDEEN
2016-12-09	WA	00-04	Male	S.TYPHIMURIUM
2016-12-09	WA	00-04	Male	S.TYPHIMURIUM
2016-12-09	WA	25-29	Male	S.TYPHIMURIUM
2016-12-09	WA	30-34	Female	S.TYPHIMURIUM
2016-12-09	WA	50-54	Female	S.TYPHIMURIUM
2016-12-09	WA	55-59	Male	S.MONTEVIDEO
2016-12-09	WA	85+	Male	S.TYPHIMURIUM
2016-12-09	NSW	00-04	Female	S.SINGAPORE
2016-12-09	NSW	00-04	Female	S.TYPHIMURIUM
2016-12-09	NSW	00-04	Male	S.VIRCHOW
2016-12-09	NSW	05-09	Female	S.INFANTIS
2016-12-09	NSW	05-09	Male	S.CHESTER
2016-12-09	NSW	05-09	Male	S.PARATYPHI B BV JAVA
2016-12-09	NSW	20-24	Male	S.TYPHIMURIUM
2016-12-09	NSW	25-29	Female	S.TYPHIMURIUM
2016-12-09	NSW	25-29	Female	S.VIRCHOW
2016-12-09	NSW	25-29	Female	UNSPECIFIED
2016-12-09	NSW	35-39	Female	S.TYPHIMURIUM
2016-12-09	NSW	40-44	Female	UNSPECIFIED
2016-12-09	NSW	50-54	Female	S.ANATUM
2016-12-09	NSW	55-59	Female	S.CHESTER
2016-12-09	NSW	60-64	Female	UNSPECIFIED
2016-12-09	NSW	70-74	Female	S.OSLO
2016-12-09	NSW	70-74	Female	S.TYPHIMURIUM
2016-12-09	Qld	00-04	Female	UNSPECIFIED
2016-12-09	Qld	00-04	Male	S.RISSEN
2016-12-09	Qld	05-09	Male	S.PARATYPHI B BV JAVA
2016-12-09	Qld	25-29	Female	UNSPECIFIED
2016-12-09	Qld	35-39	Male	UNSPECIFIED
2016-12-09	Qld	40-44	Male	S.INFANTIS
2016-12-09	Qld	50-54	Female	S.LITCHFIELD
2016-12-09	Qld	50-54	Male	S.ABERDEEN
2016-12-09	Qld	55-59	Male	S.TYPHIMURIUM
2016-12-09	Qld	75-79	Male	S.POTSDAM
2016-12-09	Qld	85+	Female	UNSPECIFIED
2016-12-09	SA	05-09	Female	S.TYPHIMURIUM
2016-12-09	SA	05-09	Male	S.TYPHIMURIUM
2016-12-09	SA	20-24	Female	S.TYPHIMURIUM
2016-12-09	SA	35-39	Female	S.TYPHIMURIUM
2016-12-09	SA	70-74	Female	S.SUBSP IIIB SER 47:L,V:Z
2016-12-09	Tas	75-79	Female	S.TYPHIMURIUM
2016-12-09	Vic	00-04	Female	S.ENTERITIDIS
2016-12-09	Vic	00-04	Female	S.JOHANNESBURG
2016-12-09	Vic	00-04	Male	S.TYPHIMURIUM
2016-12-09	Vic	15-19	Female	S.KENTUCKY
2016-12-09	Vic	20-24	Male	S.TYPHIMURIUM
2016-12-09	Vic	25-29	Female	S.ENTERITIDIS
2016-12-09	Vic	65-69	Female	S.TYPHIMURIUM
2016-12-09	Vic	70-74	Male	S.TYPHIMURIUM
2016-12-09	WA	00-04	Male	S.TYPHIMURIUM
2016-12-09	WA	00-04	Male	S.WELIKADE
2016-12-09	WA	20-24	Male	S.HADAR
2016-12-09	WA	20-24	Male	S.SINGAPORE
2016-12-09	WA	25-29	Female	S.TYPHIMURIUM
2016-12-09	WA	35-39	Female	S.CANNONHILL
2016-12-09	WA	35-39	Female	S.ENTERITIDIS
2016-12-09	WA	35-39	Male	S.TYPHIMURIUM
2016-12-09	WA	35-39	Male	S.TYPHIMURIUM
2016-12-09	WA	55-59	Female	S.TYPHIMURIUM
2016-12-09	WA	55-59	Female	S.TYPHIMURIUM
2016-12-09	WA	60-64	Female	S.HAVANA
2016-12-02	NSW	00-04	Male	S.ORION
2016-12-02	NSW	10-14	Male	S.ENTERITIDIS
2016-12-02	NSW	15-19	Female	UNSPECIFIED
2016-12-02	NSW	20-24	Male	S.SCHWARZENGRUND
2016-12-02	NSW	20-24	Male	S.VIRCHOW
2016-12-02	NSW	30-34	Male	S.READING
2016-12-02	NSW	45-49	Female	S.WELTEVREDEN
2016-12-02	NSW	45-49	Female	UNSPECIFIED
2016-12-02	NSW	45-49	Male	S.TYPHIMURIUM
2016-12-02	NSW	50-54	Female	S.TYPHIMURIUM
2016-12-02	NSW	50-54	Female	S.WANGATA
2016-12-02	NSW	50-54	Female	UNSPECIFIED
2016-12-02	NSW	55-59	Male	S.TYPHIMURIUM
2016-12-02	NSW	60-64	Female	S.TYPHIMURIUM
2016-12-02	NT	35-39	Female	S.TYPHIMURIUM
2016-12-02	NT	50-54	Male	S.ZANZIBAR
2016-12-02	Qld	00-04	Female	S.TYPHIMURIUM
2016-12-02	Qld	00-04	Female	S.TYPHIMURIUM
2016-12-02	Qld	00-04	Female	S.VIRCHOW
2016-12-02	Qld	00-04	Male	S.SINGAPORE
2016-12-02	Qld	00-04	Male	S.VIRCHOW
2016-12-02	Qld	20-24	Female	S.TYPHIMURIUM
2016-12-02	Qld	25-29	Female	S.WELTEVREDEN
2016-12-02	Qld	30-34	Female	S.PARATYPHI B BV JAVA
2016-12-02	Qld	35-39	Male	UNSPECIFIED
2016-12-02	Qld	40-44	Female	S.WELTEVREDEN
2016-12-02	Qld	40-44	Female	S.ZANZIBAR
2016-12-02	Qld	40-44	Female	UNSPECIFIED
2016-12-02	Qld	50-54	Male	S.PARATYPHI B BV JAVA
2016-12-02	Qld	55-59	Female	UNSPECIFIED
2016-12-02	Qld	65-69	Male	S.WAYCROSS
2016-12-02	SA	05-09	Female	S.TYPHIMURIUM
2016-12-02	SA	05-09	Male	S.TYPHIMURIUM
2016-12-02	SA	40-44	Female	S.TYPHIMURIUM
2016-12-02	SA	60-64	Female	S.TYPHIMURIUM
2016-12-02	SA	60-64	Male	S.ENTERITIDIS
2016-12-02	SA	80-84	Male	S.TYPHIMURIUM
2016-12-02	Tas	05-09	Male	UNSPECIFIED
2016-12-02	Tas	25-29	Male	S.AGONA
2016-12-02	Tas	75-79	Female	S.MISSISSIPPI
2016-12-02	Vic	00-04	Male	S.ENTERITIDIS
2016-12-02	Vic	00-04	Male	S.TYPHIMURIUM
2016-12-02	Vic	05-09	Female	S.TYPHIMURIUM
2016-12-02	Vic	05-09	Male	S.SCHWARZENGRUND
2016-12-02	Vic	25-29	Female	S.AGONA
2016-12-02	Vic	25-29	Female	S.TYPHIMURIUM
2016-12-02	Vic	25-29	Male	S.ENTERITIDIS
2016-12-02	Vic	30-34	Female	S.TYPHIMURIUM
2016-12-02	Vic	30-34	Male	S.NEWPORT
2016-12-02	Vic	40-44	Female	S.KOTTBUS
2016-12-02	Vic	40-44	Female	S.TYPHIMURIUM
2016-12-02	Vic	45-49	Female	S.TYPHIMURIUM
2016-12-02	Vic	50-54	Male	S.TYPHIMURIUM
2016-12-02	Vic	85+	Male	S.MISSISSIPPI
2016-12-02	WA	00-04	Female	S.TYPHIMURIUM
2016-12-02	WA	00-04	Female	S.TYPHIMURIUM
2016-12-02	WA	00-04	Male	S.PARATYPHI B BV JAVA
2016-12-02	WA	05-09	Female	S.TYPHIMURIUM
2016-12-02	WA	05-09	Female	S.TYPHIMURIUM
2016-12-02	WA	05-09	Male	S.TYPHIMURIUM
2016-12-02	WA	05-09	Male	S.TYPHIMURIUM
2016-12-02	WA	10-14	Female	S.TYPHIMURIUM
2016-12-02	WA	15-19	Female	S.ENTERITIDIS
2016-12-02	WA	25-29	Male	S.TYPHIMURIUM
2016-12-02	WA	30-34	Female	S.TYPHIMURIUM
2016-12-02	WA	35-39	Male	S.TYPHIMURIUM
2016-12-02	WA	40-44	Female	S.TYPHIMURIUM
2016-12-02	WA	40-44	Male	S.TYPHIMURIUM
2016-12-02	WA	45-49	Female	S.TYPHIMURIUM
2016-12-02	WA	60-64	Female	S.EASTBOURNE
2016-12-02	WA	60-64	Female	UNSPECIFIED
2016-12-02	WA	80-84	Male	S.TYPHIMURIUM
2016-12-02	WA	85+	Male	S.HVITTINGFOSS
2016-12-02	NSW	00-04	Male	S.SAINTPAUL
2016-12-02	NSW	00-04	Male	S.SUBSP I SER 4,5,12:I:-
2016-12-02	NSW	00-04	Male	S.TYPHIMURIUM
2016-12-02	NSW	00-04	Male	S.VIRCHOW
2016-12-02	NSW	00-04	Male	UNSPECIFIED
2016-12-02	NSW	20-24	Female	S.TYPHIMURIUM
2016-12-02	NSW	25-29	Male	S.TYPHIMURIUM
2016-12-02	NSW	25-29	Male	UNSPECIFIED
2016-12-02	NSW	30-34	Male	S.TYPHIMURIUM
2016-12-02	NSW	50-54	Male	S.WANGATA
2016-12-02	NSW	55-59	Female	S.STANLEY
2016-12-02	NSW	55-59	Male	S.TYPHIMURIUM
2016-12-02	NSW	60-64	Female	S.PARATYPHI B BV JAVA
2016-12-02	NSW	70-74	Female	UNSPECIFIED
2016-12-02	NSW	70-74	Female	UNSPECIFIED
2016-12-02	NSW	85+	Female	S.INFANTIS
2016-12-02	NSW	85+	Female	UNSPECIFIED
2016-12-02	NT	00-04	Female	S.SAINTPAUL
2016-12-02	NT	00-04	Male	S.SAINTPAUL
2016-12-02	Qld	00-04	Female	S.BIRKENHEAD
2016-12-02	Qld	00-04	Female	S.TYPHIMURIUM
2016-12-02	Qld	00-04	Male	S.BIRKENHEAD
2016-12-02	Qld	00-04	Male	S.SAINTPAUL
2016-12-02	Qld	00-04	Male	S.VIRCHOW
2016-12-02	Qld	05-09	Male	S.BIRKENHEAD
2016-12-02	Qld	05-09	Male	S.READING
2016-12-02	Qld	05-09	Male	S.TYPHIMURIUM
2016-12-02	Qld	10-14	Male	S.TYPHIMURIUM
2016-12-02	Qld	15-19	Female	S.LITCHFIELD
2016-12-02	Qld	20-24	Female	S.ENTERITIDIS
2016-12-02	Qld	20-24	Male	S.PARATYPHI B BV JAVA
2016-12-02	Qld	25-29	Female	S.VIRCHOW
2016-12-02	Qld	30-34	Male	UNSPECIFIED
2016-12-02	Qld	35-39	Female	S.TYPHIMURIUM
2016-12-02	Qld	40-44	Male	S.HAVANA
2016-12-02	Qld	40-44	Male	S.MONTEVIDEO
2016-12-02	Qld	75-79	Female	UNSPECIFIED
2016-12-02	Qld	85+	Female	S.ABERDEEN
2016-12-02	Qld	85+	Male	UNSPECIFIED
2016-12-02	SA	00-04	Female	S.SUBSP I SER 4,12:I:-
2016-12-02	SA	00-04	Female	S.TYPHIMURIUM
2016-12-02	SA	10-14	Male	S.TYPHIMURIUM
2016-12-02	SA	30-34	Male	S.CHESTER
2016-12-02	SA	35-39	Female	S.TYPHIMURIUM
2016-12-02	SA	35-39	Female	S.VIRCHOW
2016-12-02	SA	75-79	Female	S.SUBSP I SER 4,12:I:-
2016-12-02	Vic	00-04	Female	S.TYPHIMURIUM
2016-12-02	Vic	00-04	Male	S.JAVIANA
2016-12-02	Vic	00-04	Male	S.TYPHIMURIUM
2016-12-02	Vic	00-04	Male	S.TYPHIMURIUM
2016-12-02	Vic	15-19	Male	S.TYPHIMURIUM
2016-12-02	Vic	20-24	Male	S.TYPHIMURIUM
2016-12-02	Vic	20-24	Male	S.TYPHIMURIUM
2016-12-02	Vic	25-29	Female	S.TYPHIMURIUM
2016-12-02	Vic	30-34	Female	S.NEWPORT
2016-12-02	Vic	30-34	Female	S.TYPHIMURIUM
2016-12-02	Vic	30-34	Male	S.TYPHIMURIUM
2016-12-02	Vic	30-34	Male	S.TYPHIMURIUM
2016-12-02	Vic	30-34	Male	S.TYPHIMURIUM
2016-12-02	Vic	35-39	Female	S.TYPHIMURIUM
2016-12-02	Vic	45-49	Male	S.PARATYPHI B BV JAVA
2016-12-02	Vic	75-79	Male	S.TYPHIMURIUM
2016-12-02	WA	35-39	Female	S.TYPHIMURIUM
2016-12-02	WA	45-49	Female	S.TYPHIMURIUM
2016-12-02	WA	75-79	Female	S.CERRO
2016-12-02	WA	75-79	Male	S.CHOLERAESUIS VAR KUNZENDORF
2016-12-02	NSW	05-09	Female	UNSPECIFIED
2016-12-02	NSW	20-24	Female	S.PARATYPHI B BV JAVA
2016-12-02	NSW	30-34	Male	S.TYPHIMURIUM
2016-12-02	NSW	40-44	Female	S.CHESTER
2016-12-02	NSW	40-44	Male	S.TYPHIMURIUM
2016-12-02	NSW	45-49	Female	S.BIRKENHEAD
2016-12-02	NSW	45-49	Female	S.CHESTER
2016-12-02	NSW	50-54	Male	S.TYPHIMURIUM
2016-12-02	NSW	55-59	Female	S.TYPHIMURIUM
2016-12-02	NSW	55-59	Female	UNSPECIFIED
2016-12-02	NSW	55-59	Male	S.BIRKENHEAD
2016-12-02	NSW	55-59	Male	S.TYPHIMURIUM
2016-12-02	NSW	60-64	Male	S.ENTERITIDIS
2016-12-02	NSW	85+	Female	S.PARATYPHI B BV JAVA
2016-12-02	NT	00-04	Female	S.SAINTPAUL
2016-12-02	NT	00-04	Male	S.SAINTPAUL
2016-12-02	NT	20-24	Male	S.MBANDAKA
2016-12-02	NT	55-59	Female	S.VIRCHOW
2016-12-02	Qld	00-04	Female	S.BIRKENHEAD
2016-12-02	Qld	00-04	Female	S.ENTERITIDIS
2016-12-02	Qld	00-04	Male	S.CHESTER
2016-12-02	Qld	05-09	Male	S.SAINTPAUL
2016-12-02	Qld	10-14	Male	S.VIRCHOW
2016-12-02	Qld	20-24	Male	UNSPECIFIED
2016-12-02	Qld	25-29	Female	S.TYPHIMURIUM
2016-12-02	Qld	25-29	Male	UNSPECIFIED
2016-12-02	Qld	30-34	Female	S.TYPHIMURIUM
2016-12-02	Qld	45-49	Female	S.CHESTER
2016-12-02	Qld	60-64	Female	UNSPECIFIED
2016-12-02	Qld	60-64	Male	S.VIRCHOW
2016-12-02	Qld	60-64	Male	S.WANGATA
2016-12-02	Qld	65-69	Male	S.POTSDAM
2016-12-02	Qld	70-74	Male	S.ADELAIDE
2016-12-02	Qld	80-84	Female	S.WELTEVREDEN
2016-12-02	SA	25-29	Male	S.TYPHIMURIUM
2016-12-02	SA	65-69	Female	S.SAINTPAUL
2016-12-02	Tas	75-79	Female	S.TYPHIMURIUM
2016-12-02	Vic	00-04	Female	S.TYPHIMURIUM
2016-12-02	Vic	00-04	Male	S.TYPHIMURIUM
2016-12-02	Vic	05-09	Male	S.TYPHIMURIUM
2016-12-02	Vic	05-09	Male	S.TYPHIMURIUM
2016-12-02	Vic	15-19	Male	S.TYPHIMURIUM
2016-12-02	Vic	20-24	Female	S.TYPHIMURIUM
2016-12-02	Vic	25-29	Female	S.HESSAREK
2016-12-02	Vic	30-34	Female	S.KENTUCKY
2016-12-02	Vic	30-34	Male	S.TYPHIMURIUM
2016-12-02	Vic	40-44	Male	S.WELTEVREDEN
2016-12-02	Vic	45-49	Female	S.SUBSP I SER 4,5,12:I:-
2016-12-02	Vic	45-49	Male	S.TYPHIMURIUM
2016-12-02	Vic	55-59	Female	S.ENTERITIDIS
2016-12-02	Vic	55-59	Female	S.TYPHIMURIUM
2016-12-02	Vic	55-59	Female	S.WELTEVREDEN VAR 15+
2016-12-02	Vic	55-59	Male	S.TYPHIMURIUM
2016-12-02	Vic	60-64	Female	S.SUBSP I SER 4,12:I:-
2016-12-02	Vic	60-64	Female	UNSPECIFIED
2016-12-02	Vic	70-74	Male	S.ENTERITIDIS
2016-12-02	Vic	70-74	Male	UNSPECIFIED
2016-12-02	Vic	80-84	Female	S.TYPHIMURIUM
2016-12-02	WA	00-04	Male	S.TYPHIMURIUM
2016-12-02	WA	35-39	Male	S.TYPHIMURIUM
2016-12-02	WA	45-49	Male	S.TYPHIMURIUM
2016-12-02	WA	55-59	Male	UNSPECIFIED
2016-12-02	WA	70-74	Female	UNSPECIFIED
2016-12-02	NSW	00-04	Female	S.VIRCHOW
2016-12-02	NSW	00-04	Female	UNSPECIFIED
2016-12-02	NSW	05-09	Male	S.TYPHIMURIUM
2016-12-02	NSW	10-14	Male	S.VIRCHOW
2016-12-02	NSW	35-39	Male	S.NEWPORT
2016-12-02	NSW	40-44	Male	S.TYPHIMURIUM
2016-12-02	NSW	50-54	Male	S.TYPHIMURIUM
2016-12-02	NSW	55-59	Female	S.TYPHIMURIUM
2016-12-02	NSW	55-59	Male	S.TYPHIMURIUM
2016-12-02	NSW	60-64	Female	S.TYPHIMURIUM
2016-12-02	NSW	65-69	Female	S.VIRCHOW
2016-12-02	NSW	70-74	Female	S.ZANZIBAR
2016-12-02	NSW	75-79	Male	S.TYPHIMURIUM
2016-12-02	NT	00-04	Female	S.BAHRENFELD
2016-12-02	NT	00-04	Female	S.WELIKADE
2016-12-02	NT	05-09	Male	S.LIVERPOOL
2016-12-02	NT	05-09	Male	UNSPECIFIED
2016-12-02	Qld	00-04	Female	S.ADELAIDE
2016-12-02	Qld	00-04	Female	S.SAINTPAUL
2016-12-02	Qld	00-04	Female	S.TYPHIMURIUM
2016-12-02	Qld	00-04	Male	S.ABERDEEN
2016-12-02	Qld	00-04	Male	S.VIRCHOW
2016-12-02	Qld	00-04	Male	UNSPECIFIED
2016-12-02	Qld	05-09	Female	S.WELTEVREDEN
2016-12-02	Qld	20-24	Male	UNSPECIFIED
2016-12-02	Qld	30-34	Female	S.PARATYPHI B BV JAVA
2016-12-02	Qld	35-39	Male	S.WANGATA
2016-12-02	Qld	40-44	Male	S.SUBSP I
2016-12-02	Qld	50-54	Male	S.LITCHFIELD
2016-12-02	Qld	55-59	Male	S.TYPHIMURIUM
2016-12-02	Qld	65-69	Male	S.ABERDEEN
2016-12-02	SA	55-59	Female	S.CHESTER
2016-12-02	Tas	00-04	Male	S.MISSISSIPPI
2016-12-02	Tas	10-14	Male	S.MISSISSIPPI
2016-12-02	Vic	00-04	Female	S.PARATYPHI B BV JAVA
2016-12-02	Vic	00-04	Female	S.TYPHIMURIUM
2016-12-02	Vic	00-04	Male	S.TYPHIMURIUM
2016-12-02	Vic	00-04	Male	S.TYPHIMURIUM
2016-12-02	Vic	05-09	Male	S.CHESTER
2016-12-02	Vic	05-09	Male	S.TYPHIMURIUM
2016-12-02	Vic	10-14	Female	S.ENTERITIDIS
2016-12-02	Vic	10-14	Female	S.TYPHIMURIUM
2016-12-02	Vic	10-14	Male	S.TYPHIMURIUM
2016-12-02	Vic	25-29	Female	S.LIVINGSTONE
2016-12-02	Vic	25-29	Male	S.TYPHIMURIUM
2016-12-02	Vic	35-39	Female	S.CHESTER
2016-12-02	Vic	35-39	Female	S.ENTERITIDIS
2016-12-02	Vic	55-59	Female	UNSPECIFIED
2016-12-02	Vic	60-64	Male	S.TYPHIMURIUM
2016-12-02	Vic	75-79	Male	S.TYPHIMURIUM
2016-12-02	WA	00-04	Female	S.TYPHIMURIUM
2016-12-02	WA	00-04	Male	S.HEIDELBERG
2016-12-02	WA	05-09	Female	S.ENTERITIDIS
2016-12-02	WA	10-14	Male	S.TYPHIMURIUM
2016-12-02	WA	20-24	Female	S.HVITTINGFOSS
2016-12-02	WA	20-24	Female	S.TYPHIMURIUM
2016-12-02	WA	20-24	Female	S.TYPHIMURIUM
2016-12-02	WA	25-29	Female	S.TYPHIMURIUM
2016-12-02	WA	30-34	Female	S.TYPHIMURIUM
2016-12-02	WA	40-44	Female	S.TYPHIMURIUM
2016-12-02	WA	65-69	Female	S.TYPHIMURIUM
2016-12-02	WA	70-74	Female	S.TYPHIMURIUM
2016-12-02	WA	75-79	Male	S.TYPHIMURIUM
2016-12-02	NSW	00-04	Female	S.SAINTPAUL
2016-12-02	NSW	00-04	Female	S.TYPHIMURIUM
2016-12-02	NSW	25-29	Female	S.TYPHIMURIUM
2016-12-02	NSW	40-44	Female	S.TYPHIMURIUM
2016-12-02	NSW	50-54	Female	S.TYPHIMURIUM
2016-12-02	NSW	50-54	Female	S.TYPHIMURIUM
2016-12-02	NSW	65-69	Male	UNSPECIFIED
2016-12-02	NSW	70-74	Male	S.TYPHIMURIUM
2016-12-02	NT	60-64	Male	S.LITCHFIELD
2016-12-02	Qld	00-04	Female	S.ABERDEEN
2016-12-02	Qld	00-04	Male	S.WELTEVREDEN
2016-12-02	Qld	15-19	Female	UNSPECIFIED
2016-12-02	SA	25-29	Female	S.ENTERITIDIS
2016-12-02	SA	45-49	Male	S.KENTUCKY
2016-12-02	Vic	00-04	Female	S.TYPHIMURIUM
2016-12-02	Vic	10-14	Male	S.TYPHIMURIUM
2016-12-02	Vic	15-19	Male	S.ENTERITIDIS
2016-12-02	Vic	20-24	Female	S.ADELAIDE
2016-12-02	Vic	30-34	Male	S.WELTEVREDEN
2016-12-02	Vic	45-49	Female	S.SUBSP I SER 4,5,12:I:-
2016-12-02	Vic	45-49	Male	S.PARATYPHI B BV JAVA
2016-12-02	Vic	75-79	Female	S.TYPHIMURIUM
2016-12-02	Vic	85+	Female	S.TYPHIMURIUM
2016-12-02	WA	00-04	Female	S.TYPHIMURIUM
2016-12-02	WA	30-34	Female	S.TYPHIMURIUM
2016-12-02	WA	30-34	Male	S.HVITTINGFOSS
2016-12-02	WA	40-44	Female	S.TYPHIMURIUM
2016-12-02	WA	50-54	Female	S.TYPHIMURIUM
2016-12-02	WA	50-54	Male	S.KENTUCKY
2016-12-02	WA	55-59	Female	S.TYPHIMURIUM
2016-12-02	WA	65-69	Female	S.SAINTPAUL
2016-12-02	WA	75-79	Female	S.TYPHIMURIUM
2016-12-02	NSW	00-04	Female	UNSPECIFIED
2016-12-02	NSW	00-04	Male	S.TYPHIMURIUM
2016-12-02	NSW	00-04	Male	S.TYPHIMURIUM
2016-12-02	NSW	10-14	Female	S.PARATYPHI B BV JAVA
2016-12-02	NSW	20-24	Female	S.CONCORD
2016-12-02	NT	00-04	Male	S.SAINTPAUL
2016-12-02	Qld	40-44	Male	S.JOHANNESBURG
2016-12-02	Qld	45-49	Male	UNSPECIFIED
2016-12-02	Qld	65-69	Female	S.SAINTPAUL
2016-12-02	SA	00-04	Female	S.BOVISMORBIFICANS
2016-12-02	SA	15-19	Female	S.CHESTER
2016-12-02	SA	15-19	Male	S.TYPHIMURIUM
2016-12-02	SA	35-39	Female	S.TYPHIMURIUM
2016-12-02	SA	50-54	Female	S.TYPHIMURIUM
2016-12-02	SA	55-59	Male	S.TYPHIMURIUM
2016-12-02	Vic	00-04	Female	S.SUBSP I SER 4,12:I:-
2016-12-02	Vic	00-04	Female	S.TYPHIMURIUM
2016-12-02	Vic	00-04	Female	S.TYPHIMURIUM
2016-12-02	Vic	00-04	Male	S.SUBSP I SER 4,5,12:I:-
2016-12-02	Vic	00-04	Male	S.TYPHIMURIUM
2016-12-02	Vic	05-09	Female	S.TYPHIMURIUM
2016-12-02	Vic	15-19	Female	S.VIRCHOW
2016-12-02	Vic	20-24	Male	UNSPECIFIED
2016-12-02	Vic	25-29	Female	S.TYPHIMURIUM
2016-12-02	Vic	40-44	Female	S.TYPHIMURIUM
2016-12-02	Vic	45-49	Female	S.ENTERITIDIS
2016-12-02	WA	00-04	Female	S.TYPHIMURIUM
2016-12-02	WA	00-04	Male	S.SENFTENBERG
2016-12-02	WA	00-04	Male	S.TYPHIMURIUM
2016-12-02	WA	00-04	Male	S.TYPHIMURIUM
2016-12-02	WA	05-09	Male	S.TYPHIMURIUM
2016-12-02	WA	10-14	Male	S.TYPHIMURIUM
2016-12-02	WA	15-19	Female	S.TYPHIMURIUM
2016-12-02	WA	20-24	Female	S.THOMPSON
2016-12-02	WA	40-44	Female	S.TYPHIMURIUM
2016-12-02	WA	55-59	Female	S.TYPHIMURIUM
2016-12-02	NSW	00-04	Female	S.ANATUM
2016-12-02	NSW	00-04	Female	S.TYPHIMURIUM
2016-12-02	NSW	00-04	Male	S.BIRKENHEAD
2016-12-02	NSW	35-39	Female	S.TYPHIMURIUM
2016-12-02	NSW	50-54	Male	S.VIRCHOW
2016-12-02	NSW	65-69	Female	S.AGONA
2016-12-02	NT	00-04	Female	S.LITCHFIELD
2016-12-02	NT	00-04	Male	S.BOVISMORBIFICANS
2016-12-02	NT	00-04	Male	S.HAVANA
2016-12-02	NT	00-04	Male	S.JOHANNESBURG
2016-12-02	NT	00-04	Male	S.MOSCOW
2016-12-02	NT	15-19	Female	S.AGONA
2016-12-02	Qld	00-04	Female	S.JAVIANA
2016-12-02	Qld	00-04	Female	S.VIRCHOW
2016-12-02	Qld	00-04	Male	UNSPECIFIED
2016-12-02	Qld	10-14	Male	S.WAYCROSS
2016-12-02	Qld	15-19	Male	S.TYPHIMURIUM
2016-12-02	Qld	30-34	Female	S.HAVANA
2016-12-02	Qld	35-39	Female	S.WELTEVREDEN
2016-12-02	Qld	55-59	Male	UNSPECIFIED
2016-12-02	Qld	65-69	Female	S.WELTEVREDEN
2016-12-02	Qld	70-74	Male	S.TYPHIMURIUM
2016-12-02	SA	10-14	Male	S.TYPHIMURIUM
2016-12-02	SA	20-24	Female	S.SUBSP I SER 4,5,12:I:-
2016-12-02	SA	25-29	Female	S.CHESTER
2016-12-02	SA	30-34	Male	S.CHESTER
2016-12-02	SA	35-39	Female	S.CHESTER
2016-12-02	SA	35-39	Male	S.LONDON
2016-12-02	Tas	50-54	Female	S.MISSISSIPPI
2016-12-02	Tas	85+	Female	UNSPECIFIED
2016-12-02	Vic	00-04	Female	S.SUBSP I SER 4,5,12:I:-
2016-12-02	Vic	00-04	Female	UNSPECIFIED
2016-12-02	Vic	00-04	Male	S.TYPHIMURIUM
2016-12-02	Vic	00-04	Male	S.TYPHIMURIUM
2016-12-02	Vic	00-04	Male	S.WELTEVREDEN
2016-12-02	Vic	05-09	Male	S.TYPHIMURIUM
2016-12-02	Vic	15-19	Female	S.THOMPSON
2016-12-02	Vic	15-19	Male	S.RISSEN
2016-12-02	Vic	20-24	Female	S.ENTERITIDIS
2016-12-02	Vic	70-74	Female	S.HESSAREK
2016-12-02	WA	00-04	Female	S.KENTUCKY
2016-12-02	WA	00-04	Female	S.TYPHIMURIUM
2016-12-02	WA	00-04	Male	S.TYPHIMURIUM
2016-12-02	WA	35-39	Female	S.TENNESSEE
2016-12-02	WA	35-39	Male	S.VIRCHOW
2016-12-02	WA	45-49	Male	S.TYPHIMURIUM
2016-12-02	WA	55-59	Female	S.ENTERITIDIS
2016-12-02	WA	75-79	Male	S.TYPHIMURIUM
2016-11-25	NSW	05-09	Female	UNSPECIFIED
2016-11-25	NSW	20-24	Female	S.JAVIANA
2016-11-25	NSW	25-29	Female	UNSPECIFIED
2016-11-25	NSW	30-34	Male	UNSPECIFIED
2016-11-25	NSW	45-49	Female	S.ENTERITIDIS
2016-11-25	NSW	55-59	Male	S.TYPHIMURIUM
2016-11-25	NSW	70-74	Male	S.RISSEN
2016-11-25	NT	40-44	Female	S.ABERDEEN
2016-11-25	NT	40-44	Male	S.MONTEVIDEO
2016-11-25	NT	60-64	Male	S.WELTEVREDEN
2016-11-25	Qld	00-04	Male	S.CHESTER
2016-11-25	Qld	00-04	Male	S.LANSING
2016-11-25	Qld	00-04	Male	S.OSLO
2016-11-25	Qld	00-04	Male	S.SAINTPAUL
2016-11-25	Qld	00-04	Male	UNSPECIFIED
2016-11-25	Qld	15-19	Male	S.CHESTER
2016-11-25	Qld	20-24	Female	UNSPECIFIED
2016-11-25	Qld	35-39	Female	S.ENTERITIDIS
2016-11-25	Qld	40-44	Female	S.LITCHFIELD
2016-11-25	Qld	45-49	Male	S.TYPHIMURIUM
2016-11-25	Qld	55-59	Female	UNSPECIFIED
2016-11-25	Qld	60-64	Female	S.VIRCHOW
2016-11-25	Qld	65-69	Female	S.SAINTPAUL
2016-11-25	Qld	65-69	Male	UNSPECIFIED
2016-11-25	Qld	80-84	Female	S.JAVIANA
2016-11-25	Qld	80-84	Female	UNSPECIFIED
2016-11-25	Qld	85+	Female	UNSPECIFIED
2016-11-25	SA	00-04	Male	S.TYPHIMURIUM
2016-11-25	SA	05-09	Male	S.SUBSP I SER 4,5,12:I:-
2016-11-25	SA	25-29	Male	S.POTSDAM
2016-11-25	Tas	00-04	Male	S.SUBSP I SER 4,5,12:I:-
2016-11-25	Tas	05-09	Female	S.TYPHIMURIUM
2016-11-25	Tas	10-14	Male	S.TYPHIMURIUM
2016-11-25	Tas	10-14	Male	S.TYPHIMURIUM
2016-11-25	Vic	00-04	Male	S.TYPHIMURIUM
2016-11-25	Vic	05-09	Female	S.CHESTER
2016-11-25	Vic	25-29	Female	S.SUBSP I SER 4,5,12:I:-
2016-11-25	Vic	25-29	Female	S.TYPHIMURIUM
2016-11-25	Vic	25-29	Male	S.JAVIANA
2016-11-25	Vic	25-29	Male	S.TYPHIMURIUM
2016-11-25	Vic	30-34	Male	S.TYPHIMURIUM
2016-11-25	Vic	35-39	Female	S.ENTERITIDIS
2016-11-25	Vic	35-39	Female	S.TYPHIMURIUM
2016-11-25	WA	05-09	Male	S.TYPHIMURIUM
2016-11-25	WA	20-24	Male	S.TYPHIMURIUM
2016-11-25	WA	25-29	Male	S.TYPHIMURIUM
2016-11-25	WA	45-49	Male	S.SUBSP I SER 4,5,12:I:-
2016-11-25	WA	55-59	Female	S.TYPHIMURIUM
2016-11-25	WA	85+	Female	S.TYPHIMURIUM
2016-11-25	NSW	00-04	Female	S.SUBSP I SER 4,5,12:I:-
2016-11-25	NSW	00-04	Female	UNSPECIFIED
2016-11-25	NSW	00-04	Male	S.BIRKENHEAD
2016-11-25	NSW	05-09	Male	S.MONTEVIDEO
2016-11-25	NSW	05-09	Male	S.TYPHIMURIUM
2016-11-25	NSW	20-24	Female	S.CORVALLIS
2016-11-25	NSW	25-29	Female	S.TYPHIMURIUM
2016-11-25	NSW	35-39	Male	S.SUBSP I SER 4,5,12:I:-
2016-11-25	NSW	45-49	Male	S.PARATYPHI B BV JAVA
2016-11-25	NSW	60-64	Female	S.TYPHIMURIUM
2016-11-25	NSW	60-64	Male	UNSPECIFIED
2016-11-25	NSW	85+	Male	S.TYPHIMURIUM
2016-11-25	Qld	00-04	Female	S.BIRKENHEAD
2016-11-25	Qld	00-04	Male	S.WANGATA
2016-11-25	Qld	05-09	Female	UNSPECIFIED
2016-11-25	Qld	05-09	Female	UNSPECIFIED
2016-11-25	Qld	05-09	Male	UNSPECIFIED
2016-11-25	Qld	10-14	Female	UNSPECIFIED
2016-11-25	Qld	20-24	Female	S.POTSDAM
2016-11-25	Qld	40-44	Male	S.BUKAVU
2016-11-25	Qld	40-44	Male	S.TYPHIMURIUM
2016-11-25	Qld	45-49	Female	S.TYPHIMURIUM
2016-11-25	Qld	50-54	Female	S.CHESTER
2016-11-25	Qld	50-54	Male	S.SUBSP I
2016-11-25	Qld	55-59	Female	S.TYPHIMURIUM
2016-11-25	Qld	70-74	Male	S.TYPHIMURIUM
2016-11-25	SA	15-19	Female	S.ENTERITIDIS
2016-11-25	SA	25-29	Female	S.PARATYPHI B BV JAVA
2016-11-25	SA	65-69	Female	S.TYPHIMURIUM
2016-11-25	Vic	00-04	Female	S.NEWPORT
2016-11-25	Vic	00-04	Female	S.SUBSP I SER 4,12:I:-
2016-11-25	Vic	00-04	Female	S.TYPHIMURIUM
2016-11-25	Vic	00-04	Female	S.TYPHIMURIUM
2016-11-25	Vic	00-04	Male	S.TYPHIMURIUM
2016-11-25	Vic	00-04	Male	S.TYPHIMURIUM
2016-11-25	Vic	05-09	Female	S.SUBSP I SER 4,5,12:I:-
2016-11-25	Vic	10-14	Male	S.INFANTIS
2016-11-25	Vic	15-19	Male	S.TYPHIMURIUM
2016-11-25	Vic	30-34	Female	S.ENTERITIDIS
2016-11-25	Vic	30-34	Female	S.TYPHIMURIUM
2016-11-25	Vic	45-49	Male	S.TYPHIMURIUM
2016-11-25	Vic	60-64	Female	S.TYPHIMURIUM
2016-11-25	WA	00-04	Male	S.MUENCHEN
2016-11-25	WA	00-04	Male	S.TYPHIMURIUM
2016-11-25	WA	00-04	Male	S.VIRCHOW
2016-11-25	WA	25-29	Female	S.TYPHIMURIUM
2016-11-25	WA	55-59	Male	S.TYPHIMURIUM
2016-11-25	WA	75-79	Female	S.TYPHIMURIUM
2016-11-25	WA	80-84	Male	S.ANATUM
2016-11-25	NSW	00-04	Female	S.TYPHIMURIUM
2016-11-25	NSW	20-24	Female	S.TYPHIMURIUM
2016-11-25	NSW	25-29	Female	S.LIVINGSTONE
2016-11-25	NSW	25-29	Male	S.BAREILLY
2016-11-25	NSW	30-34	Female	S.CHAILEY
2016-11-25	NSW	30-34	Female	S.PARATYPHI B BV JAVA
2016-11-25	NSW	30-34	Male	S.TYPHIMURIUM
2016-11-25	NSW	35-39	Female	S.KENTUCKY
2016-11-25	NSW	40-44	Female	UNSPECIFIED
2016-11-25	NSW	40-44	Male	S.TYPHIMURIUM
2016-11-25	NSW	65-69	Female	S.KENTUCKY
2016-11-25	NSW	70-74	Female	S.ENTERITIDIS
2016-11-25	NSW	70-74	Male	S.READING
2016-11-25	NSW	Unknown	Male	S.BOVISMORBIFICANS
2016-11-25	NT	45-49	Female	S.JOHANNESBURG
2016-11-25	Qld	00-04	Female	S.ABERDEEN
2016-11-25	Qld	00-04	Female	S.ABERDEEN
2016-11-25	Qld	00-04	Female	S.TYPHIMURIUM
2016-11-25	Qld	00-04	Male	S.HVITTINGFOSS
2016-11-25	Qld	00-04	Male	S.SAINTPAUL
2016-11-25	Qld	00-04	Male	S.TYPHIMURIUM
2016-11-25	Qld	00-04	Male	UNSPECIFIED
2016-11-25	Qld	10-14	Male	S.SAINTPAUL
2016-11-25	Qld	10-14	Male	S.WELTEVREDEN
2016-11-25	Qld	20-24	Male	S.STANLEY
2016-11-25	Qld	40-44	Female	UNSPECIFIED
2016-11-25	Qld	45-49	Female	UNSPECIFIED
2016-11-25	Qld	60-64	Male	UNSPECIFIED
2016-11-25	Qld	65-69	Female	S.TYPHIMURIUM
2016-11-25	Qld	70-74	Female	S.TYPHIMURIUM
2016-11-25	Qld	85+	Female	S.TYPHIMURIUM
2016-11-25	SA	00-04	Female	S.SENFTENBERG
2016-11-25	SA	00-04	Female	S.TYPHIMURIUM
2016-11-25	SA	05-09	Female	S.HESSAREK
2016-11-25	SA	30-34	Female	UNSPECIFIED
2016-11-25	SA	70-74	Female	S.BARDO
2016-11-25	SA	70-74	Male	S.TYPHIMURIUM
2016-11-25	Tas	60-64	Female	S.MISSISSIPPI
2016-11-25	Vic	05-09	Female	S.TYPHIMURIUM
2016-11-25	Vic	20-24	Female	S.TYPHIMURIUM
2016-11-25	Vic	25-29	Male	S.BRAENDERUP
2016-11-25	Vic	35-39	Male	S.MUENCHEN
2016-11-25	Vic	40-44	Female	S.TYPHIMURIUM
2016-11-25	Vic	50-54	Male	S.TYPHIMURIUM
2016-11-25	Vic	55-59	Female	S.JAVIANA
2016-11-25	Vic	60-64	Female	S.TYPHIMURIUM
2016-11-25	Vic	65-69	Male	S.TYPHIMURIUM
2016-11-25	Vic	80-84	Male	S.TYPHIMURIUM
2016-11-25	WA	00-04	Female	S.TYPHIMURIUM
2016-11-25	WA	00-04	Male	S.CHARITY
2016-11-25	WA	40-44	Male	S.TYPHIMURIUM
2016-11-25	WA	45-49	Female	S.TYPHIMURIUM
2016-11-25	WA	50-54	Female	S.GIVE VAR 15+
2016-11-25	WA	50-54	Female	S.PARATYPHI B BV JAVA
2016-11-25	WA	50-54	Male	S.TYPHIMURIUM
2016-11-25	WA	60-64	Male	S.KENTUCKY
2016-11-25	NSW	00-04	Female	S.HVITTINGFOSS
2016-11-25	NSW	05-09	Male	S.PARATYPHI B BV JAVA
2016-11-25	NSW	05-09	Male	S.TYPHIMURIUM
2016-11-25	NSW	15-19	Female	S.BOVISMORBIFICANS
2016-11-25	NSW	15-19	Female	S.TYPHIMURIUM
2016-11-25	NSW	20-24	Male	S.TYPHIMURIUM
2016-11-25	NSW	20-24	Male	S.TYPHIMURIUM
2016-11-25	NSW	25-29	Female	S.TYPHIMURIUM
2016-11-25	NSW	25-29	Male	S.WANGATA
2016-11-25	NSW	30-34	Female	S.MUENCHEN
2016-11-25	NSW	30-34	Male	S.IBADAN
2016-11-25	NSW	45-49	Female	S.TYPHIMURIUM
2016-11-25	NSW	50-54	Female	S.ENTERITIDIS
2016-11-25	NSW	55-59	Female	S.WELTEVREDEN
2016-11-25	NSW	85+	Female	S.SUBSP I SER 4,5,12:I:-
2016-11-25	NT	00-04	Male	S.BALL
2016-11-25	NT	00-04	Male	UNSPECIFIED
2016-11-25	NT	25-29	Female	S.ENTERITIDIS
[truncated: 104,873 more rows]
